# Supplementary material for: Association of Inappropriate Outpatient Pediatric Antibiotic Prescriptions With Adverse Drug Events and Health Care Expenditures
Source: PubMed Central journal article supplement (PMC9136626; doi:10.1001/jamanetworkopen.2022.14153), 2022-05-26
Supplement: jamanetwopen-e2214153-s001.pdf [file jamanetwopen-e2214153-s001.pdf]

## Supplemental Online Content

Butler AM, Brown DS, Durkin MJ, et al. Association of inappropriate outpatient pediatric antibiotic prescriptions with adverse drug events and health care expenditures. *JAMA Netw Open*. 2022;5(5):e2214153. doi:10.1001/jamanetworkopen.2022.14153

**eMethods.** Definition of Inappropriate Antibiotic Duration for Bacterial Infections, Statistical Analysis

**eTable 1.** Diagnosis Codes to Identify Eligible Patients for Pediatric Cohorts

**eTable 2.** Medications to Identify Pediatric Patients for Exclusion

**eTable 3.** Codes to Identify Pregnancy, Mechanical Ventilation, Hematologic or Solid Organ Malignant Neoplasms, and Hematologic or Immunologic Conditions for Exclusion

**eTable 4.** Codes to Identify Pediatric Patients with Viral or Bacterial Infections for Exclusion

**eTable 5.** Medications to Identify Index Oral Antibiotic Treatment

**eTable 6.** Codes and Timing to Identify Adverse Drug Events for Comparative Safety Analyses

**eTable 7.** Codes to Identify Baseline Characteristics

**eTable 8.** Diagnosis Codes to Identify Elixhauser Comorbidities

**eTable 9.** Distribution of Index Antibiotic Agents Prescribed to Children by Infection Type

**eTable 10.** Additional Selected Baseline Characteristics of Children Diagnosed with Infections of Interest

**eTable 11.** Number of Exclusions For Adverse Drug Event Outcomes That Occurred Within 30 Days Prior to the Index Date

**eTable 12.** Unadjusted and Propensity Score–Weighted Hazard Ratio Estimates of Adverse Drug Events Following Inappropriate vs Appropriate Antibiotic Prescriptions Among Pediatric Patients

**eTable 13.** Inverse Probability Of Treatment–Weighted 30-Day All Cause and Adverse Drug Event–Related Attributable Expenditure Estimates of Inappropriate Antibiotic Prescriptions Among Children by Setting

**eTable 14.** Inverse Probability of Treatment–Weighted 30-Day Adverse Drug Event–Related Health Care Utilization and Total Per-Patient Expenditure Estimates of Inappropriate Antibiotic Prescriptions Among Children

**eTable 15.** Total 30-Day Attributable Expenditure Estimates of Inappropriate Antibiotic Prescriptions in 2017 Pediatric MarketScan Study Population, Age 6 Months to 17 Years

**eTable 16.** Confidence Intervals for Annual National Attributable 30-Day Expenditures of Inappropriate Antibiotic Prescriptions Among the US Commercially Insured Population, Age 6 Months to 17 Years

**eTable 17.** Baseline Characteristics of Children Diagnosed with a Noninfectious Clinical Condition

**eTable 18.** Distribution of Index Antibiotic Agents Prescribed to Children by Noninfectious Clinical Condition

**eTable 19.** Number of Exclusions For Adverse Drug Event Outcomes That Occurred Within 30 Days Prior to the Index Date by Noninfectious Clinical Condition

**eTable 20.** Unadjusted and Propensity Score–Weighted Hazard Ratio Estimates of Adverse Drug Events Following Inappropriate vs Appropriate Antibiotic Prescriptions Among Pediatric Patients by Noninfectious Clinical Condition

**eTable 21.** Inverse Probability of Treatment–Weighted 30-Day Health Care Utilization and All-Cause and Adverse Drug Event–Related Total Per-Patient and Attributable Expenditure Estimates of Inappropriate Antibiotic Prescriptions Among Children by Noninfectious Clinical Condition

**eTable 22.** Total Attributable Expenditures of Inappropriate Antibiotic Prescriptions Among Children by Noninfectious Clinical Condition

**eTable 23.** Sensitivity Analyses for Inverse Probability of Treatment–Weighted All-Cause Attributable Expenditure Estimates of Inappropriate Antibiotic Prescriptions Among Children by Condition

**eFigure 1.** Derivation of Pediatric Infection Cohort in MarketScan Commercial Database (Index Events April 1, 2016, to September 30, 2018)

**eFigure 2.** Standardized Mean Differences of Patient- and Provider-Level Characteristics Between Treatment Groups, in the Unweighted and Weighted Pediatric Populations, for Acute Kidney Failure Outcome Cohort

**eFigure 3.** Propensity Score–Weighted Hazard Ratio Estimates of Additional Adverse Drug Events Following Inappropriate vs Appropriate Antibiotic Prescriptions Among Pediatric Patients

**eFigure 4.** Standardized Mean Differences of Patient- and Provider-Level Characteristics Between Treatment Groups, in the Unweighted and Weighted Populations of Children with Asthma and Allergy or Asthma Exacerbation, for Acute Kidney Failure Safety Outcome Cohort

**eFigure 5.** Propensity Score–Weighted Hazard Ratio Estimates of Adverse Drug Events Following Inappropriate vs Appropriate Antibiotic Prescriptions Among Asthma or Allergy and Asthma Exacerbation Pediatric Cohorts

**eFigure 6.** Weighted 30-Day Attributable Expenditures of Inappropriate Antibiotic Prescriptions for Asthma or Allergy and Asthma Exacerbation Pediatric Cohorts

## **eReferences.**

This supplemental material has been provided by the authors to give readers additional information about their work.

## **eMethods.** Definition of Inappropriate Antibiotic Duration for Bacterial Infections, Statistical Analysis

### **Subgroup and Sensitivity Analysis: Definition of Inappropriate Antibiotic Duration for Bacterial Infections**

Inappropriate antibiotic duration was based on guideline recommendations. For suppurative OM, appropriate duration was amoxicillin for 10 days for children <2 years, 7 days for children 2–5 years, and 5–7 days for children ≥6 years.<sup>1</sup> For pharyngitis, appropriate duration was amoxicillin or penicillin for 10 days.<sup>2</sup> For sinusitis, appropriate duration was amoxicillin or amoxicillin-clavulanate for 10–14 days.<sup>3</sup> Note that unusual durations of <5 days or >14 days were excluded for this study; therefore inappropriate duration was 5–14 days and outside the recommended duration per infection.

### **Statistical Analysis**

We used stabilized inverse probability of treatment (IPT) weights to balance treatment groups within each cohort with respect to potential confounding factors. We used logistic regression to estimate the propensity of appropriate (versus inappropriate) antibiotic agent, conditional on baseline covariates. Age and average monthly expenditures were modeled using restricted cubic splines. Propensity scores were used to create weighted cohorts to estimate the treatment effects in the total population (the average treatment effect). To minimize the impact of large weights due to children being treated contrary to prediction, we applied asymmetric trimming of the propensity score as needed to account for areas of non-overlap or by percentiles (i.e., 0.5th percentile of the appropriately treated and 99.5th percentile of the inappropriately treated trimmed in the whole cohort); and propensity scores were re-estimated after these exclusions.<sup>4,5</sup> After weighting, we assessed the balance of observed covariates between treatment groups; absolute standardized mean differences < 10% in the weighted population were considered adequate.<sup>6</sup>

**eTable 1. Diagnosis Codes to Identify Eligible Patients for Pediatric Cohorts<sup>a</sup>**

|                                                             | ICD-10-CM                                      |
|-------------------------------------------------------------|------------------------------------------------|
| <b>Primary analysis: Bacterial infections</b>               |                                                |
| Suppurative OM                                              | H66.001-H66.019, H66.3X1-H67.9                 |
| Pharyngitis                                                 | A38.0-A38.9, J02.0-J03.91                      |
| Sinusitis                                                   | J01.00-J01.91, J32.0-J32.9                     |
| <b>Secondary analysis: Viral infections</b>                 |                                                |
| Bronchiolitis                                               | J21.0-J21.9                                    |
| Bronchitis                                                  | J20.0-J20.9, J40                               |
| Influenza                                                   | J09.X1-J11.89                                  |
| Viral URI                                                   | J00, J04.0-J06.9, R05                          |
| Non-suppurative OM                                          | H65.00-H65.93, H68.001-H68.029                 |
| <b>Subgroup analysis: Noninfectious clinical conditions</b> |                                                |
| Asthma/allergy                                              | J30.0-J30.9, J44.0-J45.998, T78.40XA, T78.49XA |
| Asthma exacerbation                                         | J44.1, J45.21, J45.31, J45.41, J45.51, J45.901 |

Abbreviations: ICD-10-CM, International Classification of Diseases, Tenth Revision, Clinical Modification; OM, otitis media; URI, upper respiratory infection.

<sup>a</sup> Eligible diagnoses required a claimline payment > \$0.

**eTable 2. Medications to Identify Pediatric Patients for Exclusion**

| Conditions                                                           | Medication Names                                                                                                                                                                                                                                                                                                                                                                                                                                                                                                                                                                                                                                                                                                                                                                                                                                                                                                                                       | HCPSC Codes                                                                                                                                                                                                                                                                                                                                                                                                                         |
|----------------------------------------------------------------------|--------------------------------------------------------------------------------------------------------------------------------------------------------------------------------------------------------------------------------------------------------------------------------------------------------------------------------------------------------------------------------------------------------------------------------------------------------------------------------------------------------------------------------------------------------------------------------------------------------------------------------------------------------------------------------------------------------------------------------------------------------------------------------------------------------------------------------------------------------------------------------------------------------------------------------------------------------|-------------------------------------------------------------------------------------------------------------------------------------------------------------------------------------------------------------------------------------------------------------------------------------------------------------------------------------------------------------------------------------------------------------------------------------|
| Anti-infectives <sup>a</sup>                                         | amoxicillin, amoxicillin/clavulanate, amikacin, ampicillin, ampicillin/sulbactam, azithromycin, aztreonam, cefaclor, cefazolin, cefadroxil, cefepime, cefdinir, cefditoren, cefixime, cefotetan, cefoxitin, cefpodoxime, cefprozil, ceftibuten, ceftazidime, ceftazidime/avibactam, ceftriaxone, cefuroxime, cephalexin, ceftaroline, ciprofloxacin, clarithromycin, clindamycin, dalbavancin, daptomycin, dicloxacillin, doripenem, doxycycline, ertapenem, erythromycin, ethambutol, fosfomycin, gatifloxacin, gemifloxacin, gentamicin, imipenem/cilastain, levofloxacin, linezolid, methicillin, metronidazole, minocycline, moxifloxacin, nafcillin, nitrofurantoin, norfloxacin, ofloxacin, oxacillin, penicillin, piperacillin/tazobactam, quinpristin/dalfopristin, rifabutin, rifampin, tedizolid, telithromycin, tetracycline, ticarcillin/clavulanic acid, tigecycline, tobramycin, trimethoprim, trimethoprim/sulfamethoxazole, vancomycin | C9479, J0290, J0295, J0456, J0558, J0561, J0694, J0696, J0697, J0744, J0878, J1364, J1580, J1590, J1956, J2020, J2265, J2280, J2510, J2540, J3243, J3260, J3370, J7342, J7682, J7685, Q0144, S0030, S0034, S0039, S0077                                                                                                                                                                                                             |
| Antibiotic ear drops (exclude for non-suppurative otitis media only) | bacitracin zinc/neomycin/polymyxin b sulfate, bacitracin zinc/polymyxin b sulfate, ciprofloxacin hydrochloride, ciprofloxacin hydrochloride/dexamethasone, ciprofloxacin hydrochloride/fluocinolone acetonide, ciprofloxacin hydrochloride/hydrocortisone, clindamycin phosphate, colistin sulf/hc ace/neomycin sulf/thonzonium brom, dexamethasone/neomycin sulfate/polymyxin b sulfate, erythromycin, gentamicin sulfate, hc/neomycin sulf/polymyxin b sulf, moxifloxacin hydrochloride, nystatin, ofloxacin, polymyxin b sulfate/trimethoprim sulfate, tobramycin                                                                                                                                                                                                                                                                                                                                                                                   |                                                                                                                                                                                                                                                                                                                                                                                                                                     |
| Autoimmune conditions, steroids, or other immunosuppressants         | abatacept, adalimumab, alefacept, azathioprine, balsalazide disodium, belimumab, canakinumab, certolizumab pegol, cevimeline, cyclophosphamide, cyclosporine, dexamethasone <sup>a</sup> , dexamethasone acetate <sup>a</sup> , dexamethasone sodium phosphate <sup>a</sup> , dexamethasone micronized <sup>a</sup> , efalizumab, etanercept, golimumab, immune globulin, infliximab, leflunomide, mercaptopurine, mesalamine, methotrexate, methylprednisolone <sup>a</sup> , methylprednisolone acetate <sup>a</sup> , methylprednisolone sodium succinate <sup>a</sup> , methylprednisolone micronized <sup>a</sup> , mycophenolate mofetil, mycophenolate sodium, omalizumab, prednisolone <sup>a</sup> , prednisolone acetate <sup>a</sup> , prednisolone sodium phosphate <sup>a</sup> , prednisone <sup>a</sup> , rituximab, sirolimus, sulfasalazine, tacrolimus, tocilizumab, tofacitinib, ustekinumab                                        | C9487, J0129, J0135, J0215, J0490, J0638, J0717, J0850, J1020 <sup>a</sup> , J1030 <sup>a</sup> , J1040 <sup>a</sup> , J1094 <sup>a</sup> , J1100 <sup>a</sup> , J1438, J1459, J1555, J1556, J1557, J1559, J1561, J1562, J1566, J1568, J1569, J1572, J1575, J1599, J1602, J1720, J1745, J2323, J2357, J2650 <sup>a</sup> , J2920 <sup>a</sup> , J2930 <sup>a</sup> , J3262, J3357, J3358, J3380, J7500, J7501, J7502, J7503, J7504, |

| Conditions                              | Medication Names                                                                                                                                                                                                                                                                                                                                                                                                                                                                                                                                                                                                                                                                                                                                                                                                                                                                                                                                                                                                                                                                                                                                                                                                                                                                                                                | HCPCS Codes                                                                                                                                                                                                                    |
|-----------------------------------------|---------------------------------------------------------------------------------------------------------------------------------------------------------------------------------------------------------------------------------------------------------------------------------------------------------------------------------------------------------------------------------------------------------------------------------------------------------------------------------------------------------------------------------------------------------------------------------------------------------------------------------------------------------------------------------------------------------------------------------------------------------------------------------------------------------------------------------------------------------------------------------------------------------------------------------------------------------------------------------------------------------------------------------------------------------------------------------------------------------------------------------------------------------------------------------------------------------------------------------------------------------------------------------------------------------------------------------|--------------------------------------------------------------------------------------------------------------------------------------------------------------------------------------------------------------------------------|
|                                         |                                                                                                                                                                                                                                                                                                                                                                                                                                                                                                                                                                                                                                                                                                                                                                                                                                                                                                                                                                                                                                                                                                                                                                                                                                                                                                                                 | J7506 <sup>a</sup> , J7507, J7508, J7509 <sup>a</sup> , J7510 <sup>a</sup> , J7511, J7512 <sup>a</sup> , J7515, J7517, J7520, J7525, J8530, J8540 <sup>a</sup> , J8610, J9070, J9250, J9260, J9310, J9330, Q5102, Q9989, S0108 |
| HIV/AIDS                                | abacavir, abacavir/lamivudine, abacavir/lamivudine/zidovudine, abacavir/dolutegravir/lamivudine, atazanavir, atazanavir/cobicistat, cobicistat, cobicistat/elvitegravir/emtricitabine/tenofovir, dapsone, darunavir, darunavir/cobicistat, dolutegravir, efavirenz, efavirenz/emtricitabine/tenofovir, elvitegravir/cobicistat/emtricitabine/tenofovir disoproxil fumarate, emtricitabine/tenofovir alafenamide, emtricitabine and tenofovir disoproxil fumarate, emtricitabine/rilpivirine/tenofovir, enfuvirtide, etravirine, fosamprenavir, indinavir, lamivudine, lamivudine/zidovudine, lamivudine and tenofovir disoproxil fumarate, lopinavir/ritonavir, maraviroc, nelfinavir, nevirapine, raltegravir, rilpivirine, ritonavir, saquinavir, tipranavir, tenofovir, zidovudine                                                                                                                                                                                                                                                                                                                                                                                                                                                                                                                                           |                                                                                                                                                                                                                                |
| Malignancy or myelodysplastic syndromes | aflibercept, aldesleukin, arsenic trioxide, asparaginase, atezolizumab, avelumab, azacitidine, belinostat, bendamustine, bevacizumab, bleomycin, blinatumomab, bortezomib, brentuximab, cabazitaxel, calaspargase, carboplatin, carfilzomib, carmustine, cemiplimab, cetuximab, cisplatin, cladribine, clofarabine, copanlisib, cyclophosphamide, cytarabine, dacarbazine, dactinomycin, daratumumab, daunorubicin, degarelix, denileukin, docetaxel, doxorubicin, durvalumab, elliot, elotuzumab, emapalumab, enfortumab, epirubicin, eribulin, etoposide, floxuridine, fludarabine, fluorouracil, fulvestrant, gemcitabine, gemtuzumab ozogamicin, goserelin, histrelin, hyaluronidase, idarubicin, ifosfamide, inotuzumab ozogamicin, ipilimumab, irinotecan, ixabepilone, leuprolide, mechlorethamine, melphalan, mesna, mitomycin, mitoxantrone, mogamulizumab, moxetumomab, necitumumab, nelarabine, nivolumab, obinutuzumab, ofatumumab, olaratumab, omacetaxine mepesuccinate, oxaliplatin, paclitaxel, panitumumab, pegaspargase, pembrolizumab, pemetrexed, pentostatin, pertuzumab, polatuzumab, porfimer, pralatrexate, ramucirumab, rituximab, romidepsin, streptozocin, tagraxofusp, temozolomide, temsirolimus, thiotepa, topotecan, trabectedin, trastuzumab, valrubicin, vinblastine, vincristine, vinorelbine |                                                                                                                                                                                                                                |

Abbreviations: HCPCS, Healthcare Common Procedure Coding System; HIV/AIDS, human immunodeficiency virus/acquired immunodeficiency syndrome.

<sup>a</sup> All exclusions for 180 days of baseline, with the exception of 90 days of baseline for the anti-infectives and 30 days of baseline for dexamethasone, prednisone, and prednisolone.

**eTable 3. Codes to Identify Pregnancy, Mechanical Ventilation, Hematologic or Solid Organ Malignant Neoplasms, and Hematologic or Immunologic Conditions for Exclusion**

| Condition                                 | ICD-10-CM Diagnosis Codes                                                                                                                 | ICD-10-PCS Procedure Codes                                         | CPT/HCPCS Codes                                                                                                                                                                                                                                                                                                                                                                                                                                                                                                                                                                                                                                                                                                                                                                                                                                   |
|-------------------------------------------|-------------------------------------------------------------------------------------------------------------------------------------------|--------------------------------------------------------------------|---------------------------------------------------------------------------------------------------------------------------------------------------------------------------------------------------------------------------------------------------------------------------------------------------------------------------------------------------------------------------------------------------------------------------------------------------------------------------------------------------------------------------------------------------------------------------------------------------------------------------------------------------------------------------------------------------------------------------------------------------------------------------------------------------------------------------------------------------|
| Pregnancy                                 | O00.0-O9A.53, Z33.1-Z37.9                                                                                                                 |                                                                    |                                                                                                                                                                                                                                                                                                                                                                                                                                                                                                                                                                                                                                                                                                                                                                                                                                                   |
| Mechanical ventilation                    | J95.850-J95.859, Z99.11-Z99.12                                                                                                            | 5A09358-5A0935Z, 5A09458-5A0945Z, 5A09558-5A0955Z, 5A1935Z-5A1955Z | 94002-94004                                                                                                                                                                                                                                                                                                                                                                                                                                                                                                                                                                                                                                                                                                                                                                                                                                       |
| Hematologic / solid organ malignancies    | C00.0-C43.9, C45.0-C45.7, C46.0-C7A.098, C7B.00-C80.1, C81.00-C90.32, C96.0-C96.4, C96.9-C96.Z, D03.0-D03.9, D47.Z9, E31.21-E31.23, R18.0 |                                                                    | J9000, J9015, J9017, J9019, J9020, J9022, J9023, J9025, J9027, J9032, J9033, J9034, J9035, J9036, J9039, J9040, J9041, J9042, J9043, J9044, J9045, J9047, J9050, J9055, J9057, J9060, J9065, J9070, J9098, J9100, J9118, J9119, J9120, J9130, J9145, J9150, J9151, J9153, J9155, J9160, J9171, J9173, J9175, J9176, J9177, J9178, J9179, J9181, J9185, J9190, J9198, J9200, J9201, J9202, J9203, J9204, J9205, J9206, J9207, J9208, J9209, J9210, J9211, J9217, J9218, J9219, J9225, J9226, J9228, J9229, J9230, J9245, J9246, J9261, J9262, J9263, J9264, J9266, J9267, J9268, J9269, J9271, J9280, J9285, J9293, J9295, J9299, J9301, J9302, J9303, J9305, J9306, J9307, J9308, J9309, J9311, J9312, J9313, J9315, J9320, J9328, J9330, J9340, J9351, J9352, J9354, J9355, J9356, J9357, J9358, J9360, J9370, J9371, J9390, J9395, J9400, J9600 |
| <b>Hematologic/immunologic conditions</b> |                                                                                                                                           |                                                                    |                                                                                                                                                                                                                                                                                                                                                                                                                                                                                                                                                                                                                                                                                                                                                                                                                                                   |
| Hereditary anemias                        | D55-D58                                                                                                                                   |                                                                    |                                                                                                                                                                                                                                                                                                                                                                                                                                                                                                                                                                                                                                                                                                                                                                                                                                                   |
| Aplastic anemias                          | D60.0-D61.9, D71                                                                                                                          |                                                                    |                                                                                                                                                                                                                                                                                                                                                                                                                                                                                                                                                                                                                                                                                                                                                                                                                                                   |
| Hereditary immunodeficiency               | D80-D89, D72.0, M30.3, M35.9                                                                                                              |                                                                    |                                                                                                                                                                                                                                                                                                                                                                                                                                                                                                                                                                                                                                                                                                                                                                                                                                                   |
| Coagulation/hemorrhagic                   | D66, D68.2, D69.41-D69.49                                                                                                                 |                                                                    |                                                                                                                                                                                                                                                                                                                                                                                                                                                                                                                                                                                                                                                                                                                                                                                                                                                   |
| Leukopenia                                | D70.0, D70.4                                                                                                                              |                                                                    |                                                                                                                                                                                                                                                                                                                                                                                                                                                                                                                                                                                                                                                                                                                                                                                                                                                   |

| <b>Condition</b>                            | <b>ICD-10-CM Diagnosis Codes</b>                                                                                               | <b>ICD-10-PCS Procedure Codes</b> | <b>CPT/HCPCS Codes</b> |
|---------------------------------------------|--------------------------------------------------------------------------------------------------------------------------------|-----------------------------------|------------------------|
| Hemophagocytic Syndromes                    | D76.1-D78.89                                                                                                                   |                                   |                        |
| Sarcoidosis                                 | D86.9                                                                                                                          |                                   |                        |
| AIDS                                        | B20                                                                                                                            |                                   |                        |
| Polyarteritis nodosa and related conditions | M30.0, M31.0-M31.1, M31.30, M31.4, M31.6l                                                                                      |                                   |                        |
| Diffuse diseases of connective tissue       | M32.10, M33.90, M34.0-M34.1, M34.9                                                                                             |                                   |                        |
| Spleen resection                            |                                                                                                                                | 07TP0ZZ-07TP4ZZ                   |                        |
| Transplantation                             | Z48.21-Z48.298, Z94.0-Z94.9                                                                                                    |                                   |                        |
| Rheumatologic conditions                    | M04.2-M06.9, M08.00-M08.99, M32.0-M33.19, M33.90-M33.99, M35.00-M35.1, M35.5, M35.8-M36.0, M36.8, M45.0-M45.9, M48.8X1-M48.8X9 |                                   |                        |
| Inflammatory bowel disease                  | K40.10-K40.11, K40.40-K40.41, K50.10-K51.919, K59.31                                                                           |                                   |                        |

Abbreviations: AIDS, acquired immunodeficiency syndrome; CPT, Current Procedural Terminology; HCPCS, Healthcare Common Procedure Coding System; ICD-10-CM, International Classification of Diseases, Tenth Revision, Clinical Modification; ICD-10-PCS, International Classification of Diseases, Tenth Revision, Procedure Coding System.



**eTable 4. Codes to Identify Pediatric Patients with Viral or Bacterial Infections for Exclusion**

| Infection                             | ICD-10-CM Diagnosis Codes                                                                                                                                                                                                                                                                                                                                                                                                                                                          |
|---------------------------------------|------------------------------------------------------------------------------------------------------------------------------------------------------------------------------------------------------------------------------------------------------------------------------------------------------------------------------------------------------------------------------------------------------------------------------------------------------------------------------------|
| Septicemia                            | A02.1, A20.7, A22.7, A39.2-A39.4, A39.51, A40.0-A41.9, A42.7, A48.3, I26.01, I26.90, I33.0-I33.9, I38-I40.0, I76, M32.11, R78.81, T80.211A                                                                                                                                                                                                                                                                                                                                         |
| Clinical sepsis                       | A26.7, A32.7, B37.7, R65.20-R65.21, T81.12XA                                                                                                                                                                                                                                                                                                                                                                                                                                       |
| Pneumonia                             | A02.22, A20.2, A21.2, A22.1, A37.01, A37.11, A37.81, A37.91, A42.0, A43.0, A48.1, A70, A78, B25.0, B37.1, B38.0-B38.2, B39.0-B39.2, B40.0-B40.2, B41.0, B42.0, B44.0-B44.1, B45.0, B46.0, B77.81, J09.X1, J10.00-J10.08, J11.00-J11.08, J13-J18.1, J18.8-J18.9, J85.0-J85.2, J86.0-J86.9, J95.851                                                                                                                                                                                  |
| Skin and soft tissue infection (SSTI) | A20.1, A21.0, A22.0, A28.1, A36.3, A42.2, A42.89-A42.9, A43.1-A48.0, A48.52, A68.0-A68.9, A69.20-A69.29, A77.0-A77.8, A79.0-A79.9, B47.0-B47.9, B60.0, B60.8-B64, B78.1, E83.2, K68.12, L01.00-L03.212, L03.221-L05.02, L08.0-L08.9, L73.2, L88, L92.8, L98.0, L98.3, M60.000-M60.09, M65.00-M65.08, M67.20-M67.29, M67.80-M67.89, M71.00-M71.09, M71.80-M71.89, M72.6, N98.0, O91.011-O91.23, T79.8XXA, T80.212A, T80.218A, T80.219A, T80.22XA, T80.29XA, T87.40-T87.44, T88.0XXA |
| Surgical site infection (SSI)         | K95.01, K95.81, T81.4XXA-T81.4XXS, T82.6XXA-T82.7XXS, T83.61XA-T83.6XXS, T84.50XA-T84.7XXS, T85.71XA-T85.79XS, T86.842                                                                                                                                                                                                                                                                                                                                                             |
| Bone infection                        | A02.23-A02.24, A18.01, A18.03, A25.1, A39.83-A39.84, A54.40-A54.49, H05.021-H05.029, J85.3, M00.00-M01.X9, M46.20-M46.28, M86.00-M86.9, M90.80-M90.89                                                                                                                                                                                                                                                                                                                              |
| Organ infection                       | A02.21, A18.84, A27.81, A36.81, A39.0-A39.1, A39.50, A39.52-A39.81, A39.89, A42.81-A42.82, A51.41, D73.0, D73.3-D73.5, D73.89, E06.0, E23.6, E24.1, E32.1, G00.0-G01, G03.9, G04.2, G05.3-G07, G09, I30.1-I30.9, I32, M32.12                                                                                                                                                                                                                                                       |
| Female pelvic infection               | A34, A51.0-A51.39, A51.42-A51.9, A54.00-A54.39, A54.6-A58, A63.8-A64, M02.30-M02.39, N34.1-N34.3, N70.01-N73.5, N73.9, N75.1, N76.0-N76.4, O03.0, O03.37, O03.5, O03.87, O04.5, O04.87, O07.0, O07.37, O08.0, O08.82, O23.511-O23.93, O41.1010-O41.1499, O75.3, O85, O86.11-O86.29, O86.81-O86.89, O98.111-O98.33, O98.611-O98.63, O98.811-O98.83, O99.830-O99.835                                                                                                                 |
| Gastroenteritis                       | A00.0-A02.0, A02.20, A02.25-A04.6, A04.71-A05.9, A09, A21.3, A22.2                                                                                                                                                                                                                                                                                                                                                                                                                 |
| Intraabdominal abscess / peritonitis  | A42.1, B25.2, K20.8, K35.2-K35.891, K50.014, K50.114, K50.814, K50.914, K51.014, K51.214, K51.314, K51.414, K51.514, K51.814, K51.914, K57.00-K57.93, K61.0-K61.4, K63.0, K65.0-K65.2, K65.8-K65.9, K67-K68.11, K68.19-K68.9, K75.0, K80.00-K80.01, K80.12-K80.13, K80.42-K80.43, K80.46-K80.47, K80.62-K80.63, K80.66-K80.67, K81.0, K81.2, K85.0-K85.92, K94.02, K94.12, K94.22, K94.32                                                                                          |
| Tonsillitis                           | A36.0-A36.2, A36.82-A36.84, A36.86-A37.00, A37.10, A37.80, A37.90, A38.0-A38.9, A54.5, A71.0-A74.0, H05.011-H05.019, H05.031-H05.039, H16.311-H16.319, H70.201-H70.229, J34.0-J34.1, J34.89-J35.03, J36, J38.2-J38.3, J38.7-J39.2, J39.8-J39.9, J95.02                                                                                                                                                                                                                             |
| Otitis                                | H60.00-H60.329, H60.391-H60.399, H61.90-H62.8X9, H70.001-H70.13, H73.001-H73.23                                                                                                                                                                                                                                                                                                                                                                                                    |
| Oral infections                       | K04.0-K04.02, K04.5-K04.7, K05.00-K05.329, K11.3, K12.2, K13.0, K14.0, M27.2                                                                                                                                                                                                                                                                                                                                                                                                       |
| Urinary tract infection (UTI)         | A18.14, A36.85, N10-N12, N13.6, N15.1, N15.9-N16, N28.84-N28.86, N30.00-N30.01, N30.20-N30.21, N30.80-N30.91, N34.0, N35.111-N35.114, N35.119-N35.12, N37-N39.0, N41.0-N41.3, N41.9, N43.1, N45.4, N48.21-N48.29, N49.0-N49.9, N51, O23.00-O23.43, O86.11, O86.13-O86.29, T83.510A, T83.511A, T83.512A, T83.518A, T83.51XA, T83.59XA                                                                                                                                               |

| Infection                          | ICD-10-CM Diagnosis Codes                                                                                                                                                                                                                                                                                                                                                                                                                                                                    |
|------------------------------------|----------------------------------------------------------------------------------------------------------------------------------------------------------------------------------------------------------------------------------------------------------------------------------------------------------------------------------------------------------------------------------------------------------------------------------------------------------------------------------------------|
| Miscellaneous bacterial infections | A07.8, A15.0-A32.9, A35-A37.91, A39.0-A44.9, A48.0, A48.2-A59.9, A63.0-A79.9, A82.0-A82.9, A88.1, A96.0-A96.9, A98.3-A98.5, B07.0-B07.9, B08.1, B08.4-B08.5, B08.8, B15.0-B19.9, B25.0-B33.0, B33.20-B34.8, B45.1, B47.1-B47.9, B50.0-B64, B83.4, B85.0-B99.9, D86.0-D86.9, G00.0-G03.1, G03.8-G04.02, G04.2-G05.4, G14, G37.4, G92, H70.001-H70.93, H75.00-H75.83, H95.00-H95.199, J17, J20.0-J20.7, J36, K90.81, L08.1, L94.6, M00.00-M00.89, M02.30-M02.39, M35.2, M60.009, N34.1, R11.11 |
| Otitis externa                     | B37.84, H60.00-H60.93, H62.40-H62.43                                                                                                                                                                                                                                                                                                                                                                                                                                                         |

Abbreviations: ICD-10-CM, International Classification of Diseases, Tenth Revision, Clinical Modification.

**eTable 5. Medications to Identify Index Oral Antibiotic Treatment<sup>a</sup>**

| Medication Names <sup>b,c</sup>                                                                                                                                                                                                                                                                                                                                                                                                                                                                               | HCPCS Codes                |
|---------------------------------------------------------------------------------------------------------------------------------------------------------------------------------------------------------------------------------------------------------------------------------------------------------------------------------------------------------------------------------------------------------------------------------------------------------------------------------------------------------------|----------------------------|
| amoxicillin, amoxicillin-clavanulate, azithromycin, cefaclor, cefadroxil, cefdinir, cefditoren, cefixime, cefpodoxime, cefprozil, ceftibuten, cefuroxime, cephalexin, ciprofloxacin, clarithromycin, clindamycin, dicloxacillin, doxycycline, erythromycin, fosfomycin, gemifloxacin, levofloxacin, linezolid, metronidazole, minocycline, moxifloxacin, nitrofurantoin, norfloxacin, ofloxacin, penicillin V, rifampin, sulfamethoxazole-trimethoprim, telithromycin, tetracycline, trimethoprim, vancomycin | G9313, G9314, G9315, Q0144 |

Abbreviations: HCPCS, Healthcare Common Procedure Coding System.

<sup>a</sup> Eligible prescriptions required a payment > \$0, and days' supply and metric quantity > 0.

<sup>b</sup> We defined 36 index oral antibiotics of interest based on the 2016 "antibiotic utilization" measure in the Healthcare Effectiveness Data and Information Set (HEDIS), which is a collection of quality measures reported by more than 90% of U.S. health insurance plans. We did not consider three antibiotics (i.e., sulfadiazine, lincomycin, ampicillin) because they are used to treat conditions not relevant to this study.

<sup>c</sup> For bacterial infections, antibiotics were considered appropriate if they were first-line agents per treatment guidelines and inappropriate otherwise. For viral infections and noninfectious clinical conditions, appropriate treatment was defined as no prescription for any of the 36 listed antibiotics, and a prescription of any of the 36 listed antibiotic agents was considered inappropriate. See "Antibiotic Exposure" section of the manuscript for additional details.

**eTable 6. Codes and Timing to Identify Adverse Drug Events for Comparative Safety Analyses**

| Adverse Drug Event                      | Follow-up Duration Relative to Index Date | ICD-10-CM Diagnosis Codes <sup>a</sup>                                                        |
|-----------------------------------------|-------------------------------------------|-----------------------------------------------------------------------------------------------|
| <b>Dermatologic</b>                     |                                           |                                                                                               |
| Skin rash                               | 1-14 days                                 | R21                                                                                           |
| Stevens-Johnson syndrome                | 1-14 days                                 | L511                                                                                          |
| Toxic epidermal necrolysis              | 1-14 days                                 | L51.2-L51.3                                                                                   |
| Urticaria                               | 1-14 days                                 | L50.0-L50.1, L50.6-L50.9                                                                      |
| <b>Gastrointestinal</b>                 |                                           |                                                                                               |
| Nausea/vomiting                         | 1-14 days                                 | R11.0-R11.12, R11.2                                                                           |
| Abdominal pain                          | 1-14 days                                 | R10.0-R10.33, R10.84-R10.9                                                                    |
| Non- <i>C. difficile</i> diarrhea       | 1-30 days                                 | K52.29-K52.3, K52.831-K52.9, R19.7                                                            |
| <i>C. difficile</i> infection           | 1-90 days                                 | A04.7-A04.72                                                                                  |
| <b>Hypersensitivity</b>                 |                                           |                                                                                               |
| Anaphylaxis                             | 0-2 days                                  | T78.2XXA, T88.6XXA                                                                            |
| Angioedema                              | 0-2 days                                  | H02.841-H02.849, T78.3XXA                                                                     |
| Laryngeal edema                         | 0-2 days                                  | J38.4                                                                                         |
| Unspecified allergy                     | 1-14 days                                 | T78.40XA, T78.49XA                                                                            |
| <b>Neuromuscular and skeletal</b>       |                                           |                                                                                               |
| Tendinopathy (including tendon rupture) | 1-90 days                                 | M66.20, M66.221-M66.80, M66.821-M66.9, M75.120-M75.122, M76.50-M76.62, M76.811-M76.829, M77.9 |
| <b>Kidney</b>                           |                                           |                                                                                               |
| Kidney failure                          | 1-14 days                                 | N17.0-N17.9                                                                                   |

Abbreviations: ICD-10-CM, International Classification of Diseases, Tenth Revision, Clinical Modification.

<sup>a</sup> Diagnostic/rule out claims were not included in identifying adverse drug events.

**eTable 7. Codes to Identify Baseline Characteristics**

|                                         | <b>CPT/HCPCS</b>                                                                                                                                                                                                                                                                                                               |
|-----------------------------------------|--------------------------------------------------------------------------------------------------------------------------------------------------------------------------------------------------------------------------------------------------------------------------------------------------------------------------------|
| <b>Office visits</b>                    |                                                                                                                                                                                                                                                                                                                                |
| Office visits                           | 99201-99205, 99211-99215, 99241-99245, 99381-99386, 99391-99396, 99401-99409                                                                                                                                                                                                                                                   |
| <b>Durable medical equipment</b>        |                                                                                                                                                                                                                                                                                                                                |
| Oxygen equipment                        | E0430-E0435, E0439-E0444, E1390-E1392                                                                                                                                                                                                                                                                                          |
| Home hospital bed                       | E0290-E0297, E0301-E0304, E0250, E0251, E0255, E0256, E0260, E0261, E0265, E0266, E0270, E0316                                                                                                                                                                                                                                 |
| Mobility aids                           | E0100 E0105 E0130 E0135 E0140 E0141 E0143 E0144 E0147 E0148 E0149, E0163-E0175, E0240-E0248, E0950-E1228, E1230, E1240-E1298, K0001-K0009                                                                                                                                                                                      |
| <b>Other</b>                            |                                                                                                                                                                                                                                                                                                                                |
| Non-SNF-related rehabilitation services | 92507, 92508, 92521, 92522, 92523, 92524, 92526, 92607, 92608, 92609, 92610, 92611, 92612, 92613, 92616, 92617, 97001, 97002, 97003, 97004, 97110-97150, 97161, 97162, 97163, 97164, 97165, 97166, 97167, 97168, 97530, 97532-97546, G0129, G0151, G0152, G0153, G0157, G0158, G0159, G0160, G0161, G8699, S9128, S9129, S9131 |
| Ambulance / life support                | A0426 A0427 A0428 A0429 A0999                                                                                                                                                                                                                                                                                                  |

Abbreviations: CPT, Current Procedural Terminology; HCPCS, Healthcare Common Procedure Coding System; SNF, skilled nursing facility.

**eTable 8. Diagnosis Codes to Identify Elixhauser Comorbidities**

| <b>Condition</b>                                   | <b>ICD-10-CM Diagnosis Codes</b>                                                                                                                                                                                                                                                                                       |
|----------------------------------------------------|------------------------------------------------------------------------------------------------------------------------------------------------------------------------------------------------------------------------------------------------------------------------------------------------------------------------|
| Alcohol abuse                                      | F10.10-F10.29, F10.921, F10.94-F10.99                                                                                                                                                                                                                                                                                  |
| Deficiency anemias                                 | D50.1-D53.9, D63.0-D63.8, D64.9                                                                                                                                                                                                                                                                                        |
| Rheumatoid arthritis/<br>collagen vascular disease | L90.0, L94.0-L94.1, L94.3, M05.00-M06.9, M08.00-M08.99, M12.00-M12.09, M32.0-M35.1, M35.3, M35.5, M35.8-M36.0, M36.8, M45.0-M46.1, M46.50-M46.99, M48.8X1-M48.8X9, M49.80-M49.89                                                                                                                                       |
| Chronic blood loss anemia                          | D50.0, O90.81, O99.011-O99.03                                                                                                                                                                                                                                                                                          |
| Chronic pulmonary<br>disease                       | J40-J64, J66.0-J67.9, J68.4                                                                                                                                                                                                                                                                                            |
| Congestive heart failure                           | I09.81, I50.1-I50.9                                                                                                                                                                                                                                                                                                    |
| Kidney failure                                     | I12.0, I13.11-I13.2, N18.3-N19, Z49.01-Z49.32, Z91.15, Z94.0, Z99.2                                                                                                                                                                                                                                                    |
| Coagulopathy                                       | D65-D68.4, D68.8-D68.9, D69.1, D69.3-D69.6, D75.82, O99.111-O99.13                                                                                                                                                                                                                                                     |
| Depression                                         | F32.0-F32.3, F32.8-F33.3, F33.8-F33.9, F34.1, F43.21                                                                                                                                                                                                                                                                   |
| Diabetes                                           | E08.00-E13.9, O24.011-O24.33, O24.811-O24.93, P70.2                                                                                                                                                                                                                                                                    |
| Drug abuse                                         | F11.10-F11.29, F12.10-F12.229, F12.250-F12.29, F13.10-F13.29, F14.10-F14.29, F15.10-F15.29, F16.10-F16.29, F18.10-F18.29, F19.10-F19.29, F55.0-F55.8, O99.320-O99.325                                                                                                                                                  |
| Hypertension                                       | I10-I16.9, I67.4, O10.011-O11.9, O16.1-O16.9                                                                                                                                                                                                                                                                           |
| Hypothyroidism                                     | E00.0-E00.9, E01.8-E03.3, E03.8-E03.9, E89.0                                                                                                                                                                                                                                                                           |
| Liver disease                                      | B18.0-B18.2, I85.00-I85.11, K70.0, K70.2-K70.9, K72.10-K74.69, K75.4-K75.81, K76.0, K76.6, K76.89-K76.9, Z94.4                                                                                                                                                                                                         |
| Lymphoma                                           | C81.00-C90.32, C96.0-C96.4, C96.9-C96.Z, D47.Z9                                                                                                                                                                                                                                                                        |
| Fluid and electrolyte<br>disorders                 | E86.0-E87.8                                                                                                                                                                                                                                                                                                            |
| Metastatic cancer                                  | C77.0-C79.9, C7B.00-C80.1, R18.0                                                                                                                                                                                                                                                                                       |
| Other neurological<br>disorders                    | E75.00-E75.19, E75.23, E75.25, E75.29, E75.4, F84.2, G10-G12.9, G13.2-G13.8, G20, G21.4, G24.01-G24.09, G24.2, G24.8, G25.4-G25.5, G25.81, G30.0-G31.9, G32.81, G35, G36.1-G40.B19, G47.411-G47.429, G80.3, G89.0, G91.0-G91.9, G93.7, G93.89-G94, O99.350-O99.355, P91.60-P91.63, R41.0, R41.82, R47.01, R56.00-R56.9 |
| Obesity                                            | E66.01-E66.2, E66.8-E66.9, O99.210-O99.215, R93.9, Z68.30-Z68.45, Z68.54                                                                                                                                                                                                                                               |
| Paralysis                                          | G04.1, G80.0-G80.2, G80.4-G83.9, I69.031-I69.069, I69.131-I69.169, I69.231-I69.269, I69.331-I69.369, I69.831-I69.869, I69.931-I69.969, R53.2                                                                                                                                                                           |
| Peripheral vascular<br>disorders                   | I70.0-I72.9, I73.1-I73.9, I74.2-I74.4, I76, I77.1, I77.70-I77.79, I79.0-I79.8, K55.1, K55.8-K55.9, Z95.820-Z95.828                                                                                                                                                                                                     |

| <b>Condition</b>                | <b>ICD-10-CM Diagnosis Codes</b>                                                  |
|---------------------------------|-----------------------------------------------------------------------------------|
| Pulmonary circulation disorders | I26.01-I26.92, I26.99-I27.1, I27.81-I27.9, I28.9, T80.0XXA, T82.817A, T82.818A    |
| Psychoses                       | F20.0-F20.9, F22-F31.9, F32.4-F32.5, F33.40-F33.42, F34.8-F39, F44.89, F84.3      |
| Solid tumor without metastasis  | C00.0-C43.9, C45.0-C45.7, C46.0-C76.8, C7A.00-C7A.098, D03.0-D03.9, E31.21-E31.23 |
| Valvular disease                | A52.03, I05.0-I08.9, I09.1, I09.89, I34.0-I39, Q23.0-Q23.3, Z95.2-Z95.4           |
| Weight loss                     | E40-E46, E64.0, R63.4, R63.6                                                      |

Abbreviations: ICD-10-CM, International Classification of Diseases, Tenth Revision, Clinical Modification.

**eTable 9. Distribution of Index Antibiotic Agents Prescribed to Children by Infection Type<sup>a</sup>**

| Antibiotic agent        | Bacterial Infections                 |                                   |                                 | Viral Infections                |                                 |                                    |                                 | Non-suppurative OM<br>n = 153,852<br>(%) |
|-------------------------|--------------------------------------|-----------------------------------|---------------------------------|---------------------------------|---------------------------------|------------------------------------|---------------------------------|------------------------------------------|
|                         | Suppurative OM<br>n = 601,711<br>(%) | Pharyngitis<br>n = 617,215<br>(%) | Sinusitis<br>n = 382,093<br>(%) | Influenza<br>n = 180,996<br>(%) | Viral URI<br>n = 772,040<br>(%) | Bronchiolitis<br>n = 23,931<br>(%) | Bronchitis<br>n = 72,407<br>(%) |                                          |
| None                    | 0.0                                  | 0.0                               | 0.0                             | 96.2                            | 88.0                            | 91.1                               | 29.8                            | 52.3                                     |
| Amoxicillin-clavulanate | 9.9                                  | 5.8                               | 21.5                            | 0.2                             | 0.8                             | 0.6                                | 3.1                             | 4.2                                      |
| Amoxicillin             | 69.0                                 | 63.3                              | 42.6                            | 1.3                             | 4.2                             | 4.5                                | 8.1                             | 31.9                                     |
| Azithromycin            | 6.4                                  | 13.1                              | 16.7                            | 1.8                             | 5.6                             | 2.9                                | 53.4                            | 4.3                                      |
| Cefdinir                | 12.6                                 | 7.7                               | 14.3                            | 0.3                             | 0.9                             | 0.7                                | 2.9                             | 5.9                                      |
| Cefprozil               | 0.9                                  | 0.8                               | 1.2                             | 0.0                             | 0.1                             | 0.1                                | 0.3                             | 0.4                                      |
| Cephalexin              | 0.4                                  | 4.8                               | 0.8                             | 0.1                             | 0.2                             | 0.1                                | 0.4                             | 0.3                                      |
| Penicillin V            | 0.0                                  | 2.9                               | 0.0                             | 0.0                             | 0.0                             | 0.0                                | 0.0                             | 0.0                                      |
| Other antibiotic        | 0.9                                  | 1.5                               | 2.8                             | 0.1                             | 0.3                             | 0.0                                | 1.9                             | 0.6                                      |

Abbreviations: OM, otitis media; URI, upper respiratory infection.

<sup>a</sup> Grey box denotes appropriate treatment per guidelines. Antibiotic agents used by ≥ 1% of ≥ 1 infection cohorts are reported individually for all infection cohorts.



**eTable 10. Additional Selected Baseline Characteristics of Children Diagnosed with Infections of Interest (N = 2,804,245)<sup>a,b</sup>**

|                                                    | Bacterial Infections <sup>b</sup><br>(Primary Analysis) |                                                    | Viral Infections <sup>c</sup><br>(Secondary Analysis) |                                                    |
|----------------------------------------------------|---------------------------------------------------------|----------------------------------------------------|-------------------------------------------------------|----------------------------------------------------|
|                                                    | Appropriate Antibiotic<br>(n = 1,068,417)<br>n (%)      | Inappropriate Antibiotic<br>(n = 532,602)<br>n (%) | Appropriate Antibiotic<br>(n = 977,102)<br>n (%)      | Inappropriate Antibiotic<br>(n = 226,124)<br>n (%) |
| Month of index date                                |                                                         |                                                    |                                                       |                                                    |
| January                                            | 89,025 (8.3)                                            | 41,551 (7.8)                                       | 128,353 (13.1)                                        | 20,665 (9.1)                                       |
| February                                           | 95,772 (9.0)                                            | 44,518 (8.4)                                       | 138,248 (14.2)                                        | 21,144 (9.4)                                       |
| March                                              | 81,209 (7.6)                                            | 37,208 (7.0)                                       | 77,932 (8.0)                                          | 15,483 (6.9)                                       |
| April                                              | 99,330 (9.3)                                            | 47,990 (9.0)                                       | 71,800 (7.4)                                          | 18,203 (8.1)                                       |
| May                                                | 96,124 (9.0)                                            | 47,500 (8.9)                                       | 57,026 (5.8)                                          | 16,120 (7.1)                                       |
| June                                               | 65,590 (6.1)                                            | 32,487 (6.1)                                       | 38,941 (4.0)                                          | 11,839 (5.2)                                       |
| July                                               | 60,403 (5.7)                                            | 31,389 (5.9)                                       | 37,395 (3.8)                                          | 11,680 (5.2)                                       |
| August                                             | 77,803 (7.3)                                            | 43,478 (8.2)                                       | 58,276 (6.0)                                          | 16,137 (7.1)                                       |
| September                                          | 102,873 (9.6)                                           | 55,176 (10.4)                                      | 86,661 (8.9)                                          | 22,270 (9.9)                                       |
| October                                            | 79,887 (7.5)                                            | 41,495 (7.8)                                       | 72,242 (7.4)                                          | 18,219 (8.1)                                       |
| November                                           | 103,231 (9.7)                                           | 52,361 (9.8)                                       | 93,427 (9.6)                                          | 25,436 (11.3)                                      |
| December                                           | 117,170 (11.0)                                          | 57,449 (10.8)                                      | 116,801 (12.0)                                        | 28,928 (12.8)                                      |
| Year of index date                                 |                                                         |                                                    |                                                       |                                                    |
| 2016                                               | 355,610 (33.3)                                          | 192,671 (36.2)                                     | 273,555 (28.0)                                        | 79,802 (35.3)                                      |
| 2017                                               | 453,654 (42.5)                                          | 222,331 (41.7)                                     | 417,590 (42.7)                                        | 95,774 (42.4)                                      |
| 2018                                               | 259,153 (24.3)                                          | 117,600 (22.1)                                     | 285,957 (29.3)                                        | 50,548 (22.4)                                      |
| Baseline Elixhauser Comorbidities                  |                                                         |                                                    |                                                       |                                                    |
| Alcohol abuse                                      | 232 (0.02)                                              | 172 (0.03)                                         | 193 (0.02)                                            | 71 (0.03)                                          |
| Deficiency anemias                                 | 814 (0.1)                                               | 316 (0.1)                                          | 899 (0.1)                                             | 147 (0.1)                                          |
| Rheumatoid arthritis/<br>collagen vascular disease | 193 (0.0)                                               | 160 (0.0)                                          | 164 (0.0)                                             | 51 (0.0)                                           |
| Chronic blood loss anemia                          | 22 (0.0)                                                | 16 (0.0)                                           | 13 (0.0)                                              | 1 (0.0)                                            |
| Chronic pulmonary<br>disease                       | 11,916 (1.1)                                            | 7,693 (1.4)                                        | 13,886 (1.4)                                          | 3,004 (1.3)                                        |
| Congestive heart failure                           | 43 (0.0)                                                | 8 (0.0)                                            | 59 (0.0)                                              | 8 (0.0)                                            |
| Kidney failure                                     | 34 (0.0)                                                | 12 (0.0)                                           | 18 (0.0)                                              | 11 (0.0)                                           |

|                                          | <b>Bacterial Infections<sup>b</sup></b><br><b>(Primary Analysis)</b> |                                                                  | <b>Viral Infections<sup>c</sup></b><br><b>(Secondary Analysis)</b> |                                                                  |
|------------------------------------------|----------------------------------------------------------------------|------------------------------------------------------------------|--------------------------------------------------------------------|------------------------------------------------------------------|
|                                          | <b>Appropriate Antibiotic</b><br><b>(n = 1,068,417)</b><br>n (%)     | <b>Inappropriate Antibiotic</b><br><b>(n = 532,602)</b><br>n (%) | <b>Appropriate Antibiotic</b><br><b>(n = 977,102)</b><br>n (%)     | <b>Inappropriate Antibiotic</b><br><b>(n = 226,124)</b><br>n (%) |
| Coagulopathy                             | 103 (0.0)                                                            | 78 (0.0)                                                         | 130 (0.0)                                                          | 27 (0.0)                                                         |
| Depression                               | 6,982 (0.7)                                                          | 5,042 (1.0)                                                      | 5,963 (0.6)                                                        | 1,799 (0.8)                                                      |
| Diabetes (complicated and uncomplicated) | 1,915 (0.2)                                                          | 1,481 (0.3)                                                      | 1,568 (0.2)                                                        | 533 (0.2)                                                        |
| Drug abuse                               | 568 (0.1)                                                            | 420 (0.1)                                                        | 535 (0.1)                                                          | 201 (0.1)                                                        |
| Hypertension                             | 239 (0.0)                                                            | 191 (0.0)                                                        | 252 (0.0)                                                          | 71 (0.0)                                                         |
| Hypothyroidism                           | 559 (0.1)                                                            | 406 (0.1)                                                        | 605 (0.1)                                                          | 176 (0.1)                                                        |
| Liver disease                            | 50 (0.0)                                                             | 42 (0.0)                                                         | 56 (0.0)                                                           | 16 (0.0)                                                         |
| Fluid and electrolyte disorders          | 519 (0.1)                                                            | 263 (0.1)                                                        | 477 (0.1)                                                          | 100 (0.0)                                                        |
| Other neurological disorders             | 2,580 (0.2)                                                          | 1,362 (0.3)                                                      | 2,537 (0.3)                                                        | 556 (0.3)                                                        |
| Obesity                                  | 20,496 (1.9)                                                         | 12,475 (2.3)                                                     | 18,202 (1.9)                                                       | 4,540 (2.0)                                                      |
| Paralysis                                | 1,006 (0.1)                                                          | 481 (0.1)                                                        | 1,009 (0.1)                                                        | 234 (0.1)                                                        |
| Peripheral vascular disorders            | 14 (0.0)                                                             | 16 (0.0)                                                         | 12 (0.0)                                                           | 3 (0.0)                                                          |
| Pulmonary circulation disorders          | 2,369 (0.2)                                                          | 1,607 (0.3)                                                      | 1,884 (0.2)                                                        | 574 (0.3)                                                        |
| Psychoses                                | 26 (0.0)                                                             | 9 (0.0)                                                          | 45 (0.0)                                                           | 5 (0.0)                                                          |
| Valvular disease                         | 255 (0.0)                                                            | 124 (0.0)                                                        | 320 (0.0)                                                          | 64 (0.0)                                                         |
| Weight loss                              | 4,259 (0.4)                                                          | 1,814 (0.3)                                                      | 5,345 (0.6)                                                        | 854 (0.4)                                                        |
| Prior durable medical equipment          |                                                                      |                                                                  |                                                                    |                                                                  |
| Oxygen equipment                         | 290 (0.0)                                                            | 133 (0.0)                                                        | 490 (0.1)                                                          | 71 (0.0)                                                         |
| Home hospital bed                        | 9 (0.0)                                                              | 11 (0.0)                                                         | 18 (0.0)                                                           | 3 (0.0)                                                          |
| Mobility aids                            | 472 (0.0)                                                            | 276 (0.1)                                                        | 426 (0.0)                                                          | 121 (0.1)                                                        |
| Prior other frailty markers              |                                                                      |                                                                  |                                                                    |                                                                  |
| Ambulance / life support                 | 3,996 (0.4)                                                          | 2,113 (0.4)                                                      | 4,474 (0.5)                                                        | 811 (0.4)                                                        |
| Non-SNF-related rehabilitation services  | 41,406 (3.9)                                                         | 23,806 (4.5)                                                     | 39,614 (4.1)                                                       | 8,722 (3.9)                                                      |

Abbreviations: SNF, skilled nursing facility.

<sup>a</sup> Elixhauser comorbidities, durable medical equipment, and other frailty markers were assessed from days -180 to 0 from the index date.

<sup>b</sup> For children diagnosed with bacterial infections (i.e., suppurative OM, pharyngitis, or sinusitis), antibiotic prescriptions were categorized as appropriate (i.e., first-line antibiotic agent) or inappropriate (i.e., non-first-line antibiotic agent); patients without an antibiotic prescription were excluded. First-line antibiotic agents were defined as amoxicillin for suppurative OM; amoxicillin or penicillin for pharyngitis; and amoxicillin or amoxicillin-clavulanate for sinusitis.

<sup>c</sup> For children diagnosed with viral infections (i.e., influenza, viral URI, bronchiolitis, bronchitis, or non-suppurative OM, ), antibiotic prescriptions were categorized as appropriate (no antibiotic) or inappropriate (antibiotic).

**eTable 11. Number of Exclusions For Adverse Drug Event Outcomes That Occurred Within 30 Days Prior to the Index Date**

| Adverse Drug Event Outcome                            | Bacterial Infections                 |                                   |                                 | Viral Infections                |                                 |                                    |                                 |                                         |
|-------------------------------------------------------|--------------------------------------|-----------------------------------|---------------------------------|---------------------------------|---------------------------------|------------------------------------|---------------------------------|-----------------------------------------|
|                                                       | Suppurative OM<br>N=601,711<br>n (%) | Pharyngitis<br>N=617,215<br>n (%) | Sinusitis<br>N=382,093<br>n (%) | Influenza<br>N=180,996<br>n (%) | Viral URI<br>N=772,040<br>n (%) | Bronchiolitis<br>N=23,931<br>n (%) | Bronchitis<br>N=72,407<br>n (%) | Nonsuppurative OM<br>N=153,852<br>n (%) |
| Nausea / vomiting / abdominal pain                    | 5,004 (0.8)                          | 4,379 (0.7)                       | 3,635 (1.0)                     | 1,700 (0.9)                     | 5,000 (0.6)                     | 286 (1.2)                          | 612 (0.8)                       | 1,087 (0.7)                             |
| Non- <i>C. difficile</i> diarrhea                     | 5,039 (0.8)                          | 3,456 (0.6)                       | 2,281 (0.6)                     | 1,152 (0.6)                     | 7,429 (1.0)                     | 435 (1.8)                          | 363 (0.5)                       | 1,262 (0.8)                             |
| <i>C. difficile</i> infection                         | 0 (0.0)                              | 1 (0.0)                           | 2 (0.0)                         | 0 (0.0)                         | 1 (0.0)                         | 0 (0.0)                            | 1 (0.0)                         | 1 (0.0)                                 |
| Anaphylaxis / angioedema / laryngeal edema            | 70 (0.0)                             | 69 (0.0)                          | 59 (0.0)                        | 21 (0.0)                        | 121 (0.0)                       | 2 (0.0)                            | 9 (0.0)                         | 24 (0.0)                                |
| Skin rash / urticaria                                 | 4,847 (0.8)                          | 6,614 (1.1)                       | 2,089 (0.5)                     | 603 (0.3)                       | 8,330 (1.1)                     | 290 (1.2)                          | 286 (0.4)                       | 1,291 (0.8)                             |
| Unspecified allergy                                   | 348 (0.1)                            | 336 (0.1)                         | 301 (0.1)                       | 64 (0.0)                        | 970 (0.1)                       | 26 (0.1)                           | 72 (0.1)                        | 119 (0.1)                               |
| Tendinopathy                                          | 237 (0.0)                            | 479 (0.1)                         | 441 (0.1)                       | 90 (0.0)                        | 482 (0.1)                       | 0 (0.0)                            | 82 (0.1)                        | 66 (0.0)                                |
| Stevens-Johnson syndrome / toxic epidermal necrolysis | 0 (0.0)                              | 0 (0.0)                           | 1 (0.0)                         | 0 (0.0)                         | 2 (0.0)                         | 0 (0.0)                            | 1 (0.0)                         | 1 (0.0)                                 |
| Acute kidney failure                                  | 5 (0.0)                              | 2 (0.0)                           | 3 (0.0)                         | 2 (0.0)                         | 2 (0.0)                         | 0 (0.0)                            | 0 (0.0)                         | 1 (0.0)                                 |

Abbreviations: OM, otitis media; URI, upper respiratory infection.

**eTable 12. Unadjusted and Propensity Score-weighted Hazard Ratio Estimates of Adverse Drug Events Following Inappropriate versus Appropriate Antibiotic Prescriptions Among Pediatric Patients**

| Index Diagnosis / Adverse Drug Event Outcome          | HR (95% CI) <sup>a</sup> |                           |
|-------------------------------------------------------|--------------------------|---------------------------|
|                                                       | Unadjusted               | IPT-weighted <sup>b</sup> |
| <b>Bacterial infections (primary analysis)</b>        |                          |                           |
| Suppurative OM                                        |                          |                           |
| Nausea / vomiting / abdominal pain                    | 1.17 (1.09-1.27)         | 1.20 (1.10-1.30)          |
| Non- <i>C. difficile</i> diarrhea                     | 1.00 (0.93-1.08)         | 1.30 (1.20-1.41)          |
| <i>C. difficile</i> infection                         | 5.78 (2.11-15.82)        | 6.23 (2.24-17.32)         |
| Anaphylaxis / angioedema / laryngeal edema            | 3.25 (1.97-5.35)         | 4.14 (2.48-6.92)          |
| Skin rash / urticaria                                 | 0.47 (0.44-0.50)         | 0.62 (0.58-0.66)          |
| Unspecified allergy                                   | 0.58 (0.50-0.67)         | 0.67 (0.57-0.78)          |
| Tendinopathy                                          | 1.34 (1.09-1.64)         | 0.91 (0.74-1.12)          |
| Stevens-Johnson syndrome / toxic epidermal necrolysis | NE                       | NE                        |
| Acute kidney failure                                  | NE                       | NE                        |
| Pharyngitis                                           |                          |                           |
| Nausea / vomiting / abdominal pain                    | 1.23 (1.15-1.32)         | 1.20 (1.12-1.28)          |
| Non- <i>C. difficile</i> diarrhea                     | 1.13 (1.03-1.23)         | 1.16 (1.06-1.27)          |
| <i>C. difficile</i> infection                         | 6.60 (2.44-17.88)        | 8.42 (3.09-22.95)         |
| Anaphylaxis / angioedema / laryngeal edema            | 1.41 (0.88-2.29)         | 1.49 (0.91-2.43)          |
| Skin rash / urticaria                                 | 0.52 (0.49-0.56)         | 0.60 (0.56-0.65)          |
| Unspecified allergy                                   | 0.63 (0.54-0.74)         | 0.69 (0.59-0.81)          |
| Tendinopathy                                          | 1.58 (1.37-1.83)         | 1.25 (1.08-1.45)          |
| Stevens-Johnson syndrome / toxic epidermal necrolysis | NE                       | NE                        |
| Acute kidney failure                                  | NE                       | NE                        |
| Sinusitis                                             |                          |                           |
| Nausea / vomiting / abdominal pain                    | 1.12 (1.03-1.22)         | 1.06 (0.97-1.16)          |
| Non- <i>C. difficile</i> diarrhea                     | 1.01 (0.82-1.12)         | 1.11 (1.00-1.23)          |
| <i>C. difficile</i> infection                         | 2.57 (0.92-7.27)         | 2.99 (1.05-8.49)          |
| Anaphylaxis / angioedema / laryngeal edema            | 0.69 (0.40-1.21)         | 0.71 (0.39-1.28)          |
| Skin rash / urticaria                                 | 0.56 (0.50-0.62)         | 0.64 (0.58-0.71)          |
| Unspecified allergy                                   | 0.70 (0.56-0.89)         | 0.74 (0.58-0.93)          |
| Tendinopathy                                          | 1.24 (1.06-1.44)         | 1.07 (0.91-1.25)          |
| Stevens-Johnson syndrome / toxic epidermal necrolysis | NE                       | NE                        |
| Acute kidney failure                                  | NE                       | NE                        |
| <b>Viral infections (secondary analysis)</b>          |                          |                           |
| Influenza                                             |                          |                           |
| Nausea / vomiting / abdominal pain                    | 1.06 (0.78-1.44)         | 0.98 (0.70-1.37)          |
| Non- <i>C. difficile</i> diarrhea                     | 0.70 (0.43-1.15)         | 0.55 (0.31-0.95)          |
| <i>C. difficile</i> infection                         | NE                       | NE                        |
| Anaphylaxis / angioedema / laryngeal edema            | NE                       | NE                        |
| Skin rash / urticaria                                 | 1.58 (1.02-2.45)         | 1.30 (0.81-2.10)          |

| Index Diagnosis / Adverse Drug Event Outcome          | HR (95% CI) <sup>a</sup> |                           |
|-------------------------------------------------------|--------------------------|---------------------------|
|                                                       | Unadjusted               | IPT-weighted <sup>b</sup> |
| Unspecified allergy                                   | NE                       | NE                        |
| Tendinopathy                                          | 0.83 (0.27-1.88)         | 0.93 (0.39-2.20)          |
| Stevens-Johnson syndrome / toxic epidermal necrolysis | NE                       | NE                        |
| Acute kidney failure                                  | NE                       | NE                        |
| Viral URI                                             |                          |                           |
| Nausea / vomiting / abdominal pain                    | 0.99 (0.89-1.09)         | 0.97 (0.86-1.09)          |
| Non- <i>C. difficile</i> diarrhea                     | 0.93 (0.83-1.03)         | 1.12 (0.98-1.27)          |
| <i>C. difficile</i> infection                         | NE                       | NE                        |
| Anaphylaxis / angioedema / laryngeal edema            | 0.69 (0.43-1.12)         | 0.76 (0.45-1.28)          |
| Skin rash / urticaria                                 | 1.79 (1.62-1.99)         | 2.35 (2.09-2.65)          |
| Unspecified allergy                                   | 2.25 (1.77-2.85)         | 2.77 (2.09-3.67)          |
| Tendinopathy                                          | 1.16 (0.93-1.43)         | 0.98 (0.76-1.27)          |
| Stevens-Johnson syndrome / toxic epidermal necrolysis | NE                       | NE                        |
| Acute kidney failure                                  | NE                       | NE                        |
| Bronchiolitis                                         |                          |                           |
| Nausea / vomiting / abdominal pain                    | 0.81 (0.44-1.50)         | 1.61 (0.68-3.81)          |
| Non- <i>C. difficile</i> diarrhea                     | 1.29 (0.85-1.96)         | 1.68 (0.99-2.84)          |
| <i>C. difficile</i> infection                         | NE                       | NE                        |
| Anaphylaxis / angioedema / laryngeal edema            | NE                       | NE                        |
| Skin rash / urticaria                                 | 1.33 (0.71-2.51)         | 1.46 (0.71-2.99)          |
| Unspecified allergy                                   | NE                       | NE                        |
| Tendinopathy                                          | NE                       | NE                        |
| Stevens-Johnson syndrome / toxic epidermal necrolysis | NE                       | NE                        |
| Acute kidney failure                                  | NE                       | NE                        |
| Bronchitis                                            |                          |                           |
| Nausea / vomiting / abdominal pain                    | 0.68 (0.55-0.85)         | 0.72 (0.57-0.90)          |
| Non- <i>C. difficile</i> diarrhea                     | 0.86 (0.63-1.19)         | 0.82 (0.58-1.14)          |
| <i>C. difficile</i> infection                         | NE                       | NE                        |
| Anaphylaxis / angioedema / laryngeal edema            | NE                       | NE                        |
| Skin rash / urticaria                                 | 1.24 (0.87-1.76)         | 1.20 (0.83-1.73)          |
| Unspecified allergy                                   | 1.19 (0.64-2.22)         | 1.47 (0.75-2.87)          |
| Tendinopathy                                          | 0.89 (0.59-1.35)         | 0.77 (0.49-1.19)          |
| Stevens-Johnson syndrome / toxic epidermal necrolysis | NE                       | NE                        |
| Acute kidney failure                                  | NE                       | NE                        |
| Non-suppurative OM                                    |                          |                           |
| Nausea / vomiting / abdominal pain                    | 0.86 (0.73-1.01)         | 0.84 (0.69-1.01)          |
| Non- <i>C. difficile</i> diarrhea                     | 1.25 (1.08-1.44)         | 1.19 (1.01-1.40)          |
| <i>C. difficile</i> infection                         | NE                       | NE                        |
| Anaphylaxis / angioedema / laryngeal edema            | 0.56 (0.21-1.52)         | 0.52 (0.19-1.43)          |
| Skin rash / urticaria                                 | 2.55 (2.23-2.93)         | 2.21 (1.91-2.56)          |
| Unspecified allergy                                   | 3.23 (2.26-4.62)         | 3.18 (2.13-4.77)          |

| Index Diagnosis / Adverse Drug Event Outcome          | HR (95% CI) <sup>a</sup> |                           |
|-------------------------------------------------------|--------------------------|---------------------------|
|                                                       | Unadjusted               | IPT-weighted <sup>b</sup> |
| Tendinopathy                                          | 0.75 (0.50-1.11)         | 0.73 (0.49-1.10)          |
| Stevens-Johnson syndrome / toxic epidermal necrolysis | NE                       | NE                        |
| Acute kidney failure                                  | NE                       | NE                        |

Abbreviations: CI, confidence interval; HR, hazard ratio; IPT, inverse probability of treatment; NE, not estimable; OM, otitis media; URI, upper respiratory infection.

<sup>a</sup> For hazard ratio estimation, we required  $\geq 5$  adverse event cases in both the reference category (i.e., appropriate antibiotic prescription) and the comparator group (i.e., inappropriate antibiotic prescription) to ensure stability of the effect estimate.

<sup>b</sup> Results for weighted hazard ratios are also presented in Figure 1 of main manuscript.

**eTable 13. Inverse Probability Of Treatment–Weighted 30-Day All Cause and Adverse Drug Event–Related Attributable Expenditure Estimates of Inappropriate Antibiotic Prescriptions Among Children by Setting<sup>a</sup>**

| <b>Expenditure Category</b>                    | <b>Patient-Level Attributable Expenditure Estimates (95% CI), \$</b> |
|------------------------------------------------|----------------------------------------------------------------------|
| <b>Bacterial infections (primary analysis)</b> |                                                                      |
| Suppurative OM                                 |                                                                      |
| All-cause total                                | 56 (43, 68)                                                          |
| Inpatient medical                              | 3 (-9, 14)                                                           |
| Emergency department                           | 2 (0, 3)                                                             |
| Outpatient medical                             | 17 (13, 22)                                                          |
| Outpatient pharmacy                            | 34 (30, 38)                                                          |
| Adverse drug event-related                     | 2 (0, 5)                                                             |
| Pharyngitis                                    |                                                                      |
| All-cause total                                | 42 (29, 52)                                                          |
| Inpatient medical                              | -1 (-12, 9)                                                          |
| Emergency department                           | 5 (3, 7)                                                             |
| Outpatient medical                             | 13 (10, 17)                                                          |
| Outpatient pharmacy                            | 25 (22, 28)                                                          |
| Adverse drug event-related                     | 1 (-4, 6)                                                            |
| Sinusitis                                      |                                                                      |
| All-cause total                                | 21 (3, 36)                                                           |
| Inpatient medical                              | -1 (-16, 12)                                                         |
| Emergency department                           | 1 (-2, 4)                                                            |
| Outpatient medical                             | 1 (-7, 8)                                                            |
| Outpatient pharmacy                            | 20 (16, 24)                                                          |
| Adverse drug event-related                     | 0 (-8, 7)                                                            |
| <b>Viral infections (secondary analysis)</b>   |                                                                      |
| Influenza                                      |                                                                      |
| All-cause total                                | 97 (43, 141)                                                         |
| Inpatient medical                              | -6 (-49, 28)                                                         |
| Emergency department                           | -3 (-19, 16)                                                         |
| Outpatient medical                             | 69 (41, 86)                                                          |
| Outpatient pharmacy                            | 38 (29, 47)                                                          |
| Adverse drug event-related                     | 19 (-30, 40)                                                         |
| Viral URI                                      |                                                                      |
| All-cause total                                | 81 (54, 106)                                                         |
| Inpatient medical                              | 23 (-5, 44)                                                          |
| Emergency department                           | 2 (-2, 6)                                                            |
| Outpatient medical                             | 35 (28, 43)                                                          |
| Outpatient pharmacy                            | 21 (17, 25)                                                          |
| Adverse drug event-related                     | 11 (1, 17)                                                           |
| Bronchiolitis                                  |                                                                      |
| All-cause total                                | -8 (-98, 67)                                                         |
| Inpatient medical                              | -74 (-156, -18)                                                      |
| Emergency department                           | 11 (-32, 47)                                                         |



| <b>Expenditure Category</b> | <b>Patient-Level Attributable Expenditure Estimates<br/>(95% CI), \$</b> |
|-----------------------------|--------------------------------------------------------------------------|
| Outpatient medical          | 20 (-36, 57)                                                             |
| Outpatient pharmacy         | 35 (17, 48)                                                              |
| Adverse drug event-related  | 56 (-61, 109)                                                            |
| <b>Bronchitis</b>           |                                                                          |
| All-cause total             | -24 (-56, 11)                                                            |
| Inpatient medical           | 8 (-13, 33)                                                              |
| Emergency department        | -19 (-27, -10)                                                           |
| Outpatient medical          | -34 (-50, -17)                                                           |
| Outpatient pharmacy         | 22 (12, 31)                                                              |
| Adverse drug event-related  | -10 (-22, 7)                                                             |
| <b>Non-suppurative OM</b>   |                                                                          |
| All-cause total             | -96 (-124, -73)                                                          |
| Inpatient medical           | 0 (-21, 19)                                                              |
| Emergency department        | -6 (-11, -2)                                                             |
| Outpatient medical          | -112 (-124, -101)                                                        |
| Outpatient pharmacy         | 22 (15, 28)                                                              |
| Adverse drug event-related  | 3 (-1, 7)                                                                |

Abbreviations: CI, confidence interval; OM, otitis media; URI, upper respiratory infection

<sup>a</sup> In the inverse probability of treatment (IPT)-weighted population, all measured baseline characteristics were well-balanced between treatment groups (standardized mean differences [SMD] < 0.10) with the following exceptions: provider specialty for all-cause and ADE-related expenditures for the suppurative otitis media (SMD=0.14), influenza (SMD=0.14), and bronchiolitis (SMD=0.18) cohorts.

**eTable 14. Inverse Probability of Treatment–Weighted 30-Day Adverse Drug Event–Related Health Care Utilization and Total Per-Patient Expenditure Estimates of Inappropriate Antibiotic Prescriptions Among Children**

|                                                | Appropriate Antibiotic Health Care Utilization N (%) | Inappropriate Antibiotic Health Care Utilization N (%) | Appropriate Antibiotic Total Per-patient Expenditure Estimates (mean (SD)), \$ | Inappropriate Antibiotic Total Per-patient Expenditure Estimates (mean (SD)), \$ |
|------------------------------------------------|------------------------------------------------------|--------------------------------------------------------|--------------------------------------------------------------------------------|----------------------------------------------------------------------------------|
| <b>Index diagnosis</b>                         |                                                      |                                                        |                                                                                |                                                                                  |
| <b>Bacterial infections (primary analysis)</b> |                                                      |                                                        |                                                                                |                                                                                  |
| Suppurative OM                                 | 9,424 (2.3)                                          | 3,756 (2.1)                                            | 16 (422)                                                                       | 19 (758)                                                                         |
| Pharyngitis                                    | 7,956 (2.0)                                          | 3,578 (1.8)                                            | 19 (843)                                                                       | 22 (1,377)                                                                       |
| Sinusitis                                      | 4,211 (1.8)                                          | 2,100 (1.6)                                            | 21 (849)                                                                       | 23 (1,653)                                                                       |
| <b>Viral infections (secondary analysis)</b>   |                                                      |                                                        |                                                                                |                                                                                  |
| Influenza                                      | 1,919 (1.2)                                          | 70 (1.1)                                               | 14 (450)                                                                       | 51 (2,640)                                                                       |
| Viral URI                                      | 8,070 (1.3)                                          | 1,571 (1.8)                                            | 14 (520)                                                                       | 22 (992)                                                                         |
| Bronchiolitis                                  | 366 (1.9)                                            | 72 (3.6)                                               | 16 (302)                                                                       | 49 (1,423)                                                                       |
| Bronchitis                                     | 228 (1.1)                                            | 545 (1.1)                                              | 27 (973)                                                                       | 15 (376)                                                                         |
| Non-suppurative OM                             | 873 (1.4)                                            | 1,345 (2.2)                                            | 14 (436)                                                                       | 18 (426)                                                                         |

Abbreviations: OM, otitis media; SD, standard deviation; URI, upper respiratory infection.

**eTable 15. Total 30-Day Attributable Expenditure Estimates of Inappropriate Antibiotic Prescriptions in 2017 Pediatric MarketScan Study Population, Age 6 Months to 17 Years<sup>a</sup>**

|                                                | Attributable Expenditures (2018 USD) |                               |                                     |                                  |                                     |
|------------------------------------------------|--------------------------------------|-------------------------------|-------------------------------------|----------------------------------|-------------------------------------|
|                                                | Inpatient Medical, \$                | Emergency Department, \$      | Outpatient Medical, \$              | Outpatient Pharmacy, \$          | Total, \$                           |
| <b>Bacterial infections (primary analysis)</b> |                                      |                               |                                     |                                  |                                     |
| Suppurative OM                                 | 205,120 (-686,389, 1,023,786)        | 129,169 (-14,819, 258,000)    | 1,302,841 (975,856, 1,638,577)      | 2,564,018 (2,272,945, 2,818,236) | 4,201,050 (3,248,039, 5,062,570)    |
| Pharyngitis                                    | -125,048 (-1,056,613, 743,823)       | 427,498 (231,817, 589,766)    | 1,117,876 (820,783, 1,473,947)      | 2,125,705 (1,888,669, 2,407,574) | 3,545,682 (2,477,750, 4,425,400)    |
| Sinusitis                                      | -83,192 (-876,691, 660,927)          | 45,862 (-120,000, 208,550)    | 67,266 (-366,076, 452,932)          | 1,139,120 (920,392, 1,317,809)   | 1,168,699 (140,731, 1,995,259)      |
| <b>Viral infections (secondary analysis)</b>   |                                      |                               |                                     |                                  |                                     |
| Influenza                                      | -17,600 (-142,670, 82,028)           | -9,599 (-54,295, 45,260)      | 201,688 (119,337, 250,992)          | 109,680 (84,884, 137,385)        | 284,023 (125,835, 412,514)          |
| Viral URI                                      | 894,350 (-194,798, 1,690,734)        | 72,385 (-73,884, 216,700)     | 1,357,454 (1,079,019, 1,653,214)    | 827,237 (649,309, 972,339)       | 3,150,638 (2,092,262, 4,119,284)    |
| Bronchiolitis                                  | -68,912 (-146,056, -16,668)          | 10,093 (-30,183, 43,534)      | 18,313 (-33,713, 53,201)            | 32,767 (16,237, 45,136)          | -7,803 (-91,717, 62,651)            |
| Bronchitis                                     | 164,411 (-263,597, 688,161)          | -402,590 (-562,727, -210,225) | -717,702 (-1,032,880, -359,228)     | 463,832 (259,280, 641,196)       | -492,599 (-1,167,722, 228,498)      |
| Non-suppurative OM                             | -2,729 (-555,725, 505,091)           | -161,490 (-285,601, -57,967)  | -3,015,469 (-3,336,334, -2,709,938) | 598,548 (413,101, 764,408)       | -2,581,946 (-3,321,732, -1,954,618) |

Abbreviations: OM, otitis media; URI, upper respiratory infection; USA, United States dollar.

<sup>a</sup> Bronchiolitis cohort was restricted to ages 6 months to 3 years; bronchitis cohort was restricted to ages 5–17 years.

**eTable 16. Confidence Intervals for Annual National Attributable 30-Day Expenditures of Inappropriate Antibiotic Prescriptions Among the US Commercially Insured Population, Age 6 Months to 17 Years<sup>a</sup>**

|                                                | Attributable Expenditures (2018 USD) |                                     |                                        |                                     |                                        |
|------------------------------------------------|--------------------------------------|-------------------------------------|----------------------------------------|-------------------------------------|----------------------------------------|
|                                                | Inpatient Medical, \$                | Emergency Department, \$            | Outpatient Medical, \$                 | Outpatient Pharmacy, \$             | Total, \$                              |
| <b>Bacterial infections (primary analysis)</b> |                                      |                                     |                                        |                                     |                                        |
| Suppurative OM                                 | 1,235,313 (-4,133,695, 6,165,627)    | 777,904 (-89,245, 1,553,777)        | 7,846,200 (5,876,975, 9,868,131)       | 15,441,487 (13,688,535, 16,972,489) | 25,300,317 (19,560,922, 30,488,716)    |
| Pharyngitis                                    | -750,188 (-6,338,857, 4,462,360)     | 2,564,653 (1,390,722, 3,538,139)    | 6,706,388 (4,924,062, 8,842,534)       | 12,752,577 (11,330,547, 14,443,571) | 21,271,338 (14,864,574, 26,548,959)    |
| Sinusitis                                      | -503,873 (-5,309,896, 4,003,067)     | 277,773 (-726,807, 1,263,137)       | 407,416 (-2,217,231, 2,743,293)        | 6,899,358 (5,574,584, 7,981,632)    | 7,078,513 (852,372, 12,084,775)        |
| <b>Viral infections (secondary analysis)</b>   |                                      |                                     |                                        |                                     |                                        |
| Influenza                                      | -98,806 (-800,965, 460,513)          | -53,888 (-304,819, 254,097)         | 1,132,300 (669,970, 1,409,102)         | 615,754 (476,547, 771,296)          | 1,594,541 (706,451, 2,315,904)         |
| Viral URI                                      | 5,430,897 (-1,182,902, 10,266,901)   | 439,555 (-448,658, 1,315,898)       | 8,243,074 (6,552,289, 10,039,062)      | 5,023,360 (3,942,899, 5,904,483)    | 19,132,099 (12,705,163, 25,014,159)    |
| Bronchiolitis                                  | -334,451 (-708,855, -80,897)         | 48,984 (-146,488, 211,286)          | 88,877 (-163,622, 258,203)             | 159,028 (78,805, 219,061)           | -37,871 (-445,134, 304,064)            |
| Bronchitis                                     | 1,059,296 (-1,698,346, 4,433,790)    | -2,593,873 (-3,625,627, -1,354,471) | -4,624,124 (-6,654,804, -2,314,488)    | 2,988,452 (1,670,530, 4,131,198)    | -3,173,797 (-7,523,579, 1,472,204)     |
| Non-suppurative OM                             | -16,270 (-3,313,681, 3,011,763)      | -962,935 (-1,702,981, -345,646)     | -17,980,659 (-19,893,913, -16,158,840) | 3,569,023 (2,463,241, 4,558,019)    | -15,395,644 (-19,806,845, -11,655,009) |

Abbreviations: OM, otitis media; URI, upper respiratory infection; USA, United States dollar.

<sup>a</sup> Bronchiolitis cohort was restricted to ages 6 months to 3 years; bronchitis cohort was restricted to ages 5–17 years.

**eTable 17. Baseline Characteristics of Children Diagnosed with a Noninfectious Clinical Condition<sup>a,b</sup>**

|                                         | Noninfectious Clinical Condition <sup>c</sup> |                                            |
|-----------------------------------------|-----------------------------------------------|--------------------------------------------|
|                                         | Appropriate Antibiotic<br>n = 546,793 (%)     | Inappropriate Antibiotic<br>n = 29,558 (%) |
| Demographic characteristics             |                                               |                                            |
| Age, mean (SD), y                       | 10 (3)                                        | 9 (5)                                      |
| Male sex                                | 310,579 (56.8)                                | 16,754 (56.7)                              |
| Health insurance plan type              |                                               |                                            |
| Basic, comprehensive                    | 79,808 (14.6)                                 | 3,983 (13.5)                               |
| CDHP                                    | 69,934 (12.8)                                 | 3,935 (13.3)                               |
| EPO or PPO                              | 292,977 (53.6)                                | 16,463 (55.7)                              |
| HMO                                     | 56,749 (10.4)                                 | 2,687 (55.7)                               |
| POS or POS with capitation              | 36,551 (6.7)                                  | 1,921 (6.5)                                |
| Unknown                                 | 10,774 (1.2)                                  | 569 (1.9)                                  |
| Urban residence                         | 464,023 (84.9)                                | 24,134 (81.7)                              |
| Geographic region                       |                                               |                                            |
| Midwest                                 | 110,739 (20.3)                                | 4,671 (15.8)                               |
| Northeast                               | 108,377 (19.8)                                | 5,516 (18.9)                               |
| South                                   | 233,764 (42.8)                                | 14,833 (50.2)                              |
| West                                    | 93,913 (17.2)                                 | 4,538 (15.4)                               |
| Month of index date                     |                                               |                                            |
| January                                 | 23,760 (4.4)                                  | 1,843 (6.2)                                |
| February                                | 25,067 (4.6)                                  | 2,020 (6.8)                                |
| March                                   | 30,610 (5.6)                                  | 1,976 (6.7)                                |
| April                                   | 56,028 (10.3)                                 | 3,076 (10.4)                               |
| May                                     | 59,906 (11.0)                                 | 2,914 (9.9)                                |
| June                                    | 46,950 (8.6)                                  | 1,797 (6.1)                                |
| July                                    | 50,393 (9.2)                                  | 1,437 (4.9)                                |
| August                                  | 72,439 (13.3)                                 | 2,345 (7.9)                                |
| September                               | 64,596 (11.8)                                 | 3,530 (11.9)                               |
| October                                 | 45,299 (8.3)                                  | 2,665 (9.0)                                |
| November                                | 40,170 (7.4)                                  | 3,078 (10.4)                               |
| December                                | 31,575 (5.8)                                  | 2,877 (9.7)                                |
| Year of index date                      |                                               |                                            |
| 2016                                    | 204,683 (37.4)                                | 11,320 (38.3)                              |
| 2017                                    | 207,774 (38.0)                                | 11,932 (40.4)                              |
| 2018                                    | 134,336 (24.6)                                | 6,306 (21.3)                               |
| Index characteristics                   |                                               |                                            |
| Index provider specialty                |                                               |                                            |
| Emergency medicine                      | 11,095 (2.0)                                  | 399 (1.4)                                  |
| Internal medicine                       | 12,494 (2.3)                                  | 787 (2.7)                                  |
| Other/unknown                           | 189,016 (34.6)                                | 6,919 (23.4)                               |
| Pediatrics/family medicine              | 334,188 (61.1)                                | 21,453 (72.6)                              |
| Index provider location                 |                                               |                                            |
| Emergency department                    | 22,941 (4.2)                                  | 294 (1.0)                                  |
| Office                                  | 493,765 (90.3)                                | 27,398 (92.7)                              |
| Other / unknown                         | 18,467 (3.4)                                  | 576 (2.0)                                  |
| Retail clinic                           | 298 (0.1)                                     | 19 (0.1)                                   |
| Urgent care center                      | 11,322 (2.1)                                  | 1,271 (4.3)                                |
| Baseline characteristics prior to index |                                               |                                            |
| Prior emergency department visit        | 36,476 (6.7)                                  | 2,151 (7.3)                                |

|                                                            | Noninfectious Clinical Condition <sup>c</sup> |                                            |
|------------------------------------------------------------|-----------------------------------------------|--------------------------------------------|
|                                                            | Appropriate Antibiotic<br>n = 546,793 (%)     | Inappropriate Antibiotic<br>n = 29,558 (%) |
| Prior number of office visits,<br>median (IQR)             | 1 (0-2)                                       | 1 (0-3)                                    |
| Prior number of unique medication<br>classes, median (IQR) | 0 (0-1)                                       | 1 (0-2)                                    |
| Baseline Elixhauser Comorbidities                          |                                               |                                            |
| Alcohol abuse                                              | 150 (0.0)                                     | 8 (0.0)                                    |
| Deficiency anemias                                         | 376 (0.1)                                     | 15 (0.1)                                   |
| Rheumatoid arthritis/<br>collagen vascular disease         | 116 (0.0)                                     | 9 (0.0)                                    |
| Chronic blood loss anemia                                  | 21 (0.0)                                      | 0 (0.0)                                    |
| Chronic pulmonary disease                                  | 19,792 (3.6)                                  | 4,018 (13.6)                               |
| Congestive heart failure                                   | 7 (0.0)                                       | 1 (0.0)                                    |
| Kidney failure                                             | 15 (0.0)                                      | 0 (0.0)                                    |
| Coagulopathy                                               | 78 (0.0)                                      | 6 (0.0)                                    |
| Depression                                                 | 5,415 (1.0)                                   | 238 (0.8)                                  |
| Diabetes (complicated and<br>uncomplicated)                | 943 (0.2)                                     | 57 (0.2)                                   |
| Drug abuse                                                 | 445 (0.1)                                     | 35 (0.1)                                   |
| Hypertension                                               | 225 (0.0)                                     | 14 (0.1)                                   |
| Hypothyroidism                                             | 365 (0.1)                                     | 24 (0.1)                                   |
| Liver disease                                              | 25 (0.0)                                      | 1 (0.0)                                    |
| Fluid and electrolyte<br>disorders                         | 184 (0.0)                                     | 19 (0.1)                                   |
| Other neurological<br>disorders                            | 1,475 (0.3)                                   | 83 (0.3)                                   |
| Obesity                                                    | 19,261 (3.5)                                  | 872 (3.0)                                  |
| Paralysis                                                  | 598 (0.1)                                     | 33 (0.1)                                   |
| Peripheral vascular<br>disorders                           | 9 (0.0)                                       | 0 (0.0)                                    |
| Pulmonary circulation<br>disorders                         | 20 (0.0)                                      | 0 (0.0)                                    |
| Psychoses                                                  | 1,669 (0.3)                                   | 82 (0.3)                                   |
| Valvular disease                                           | 118 (0.0)                                     | 4 (0.0)                                    |
| Weight loss                                                | 2,666 (0.5)                                   | 130 (0.4)                                  |
| Prior durable medical equipment                            |                                               |                                            |
| Oxygen equipment                                           | 253 (0.1)                                     | 13 (0.0)                                   |
| Home hospital bed                                          | 11 (0.0)                                      | 2 (0.0)                                    |
| Mobility aids                                              | 286 (0.1)                                     | 20 (0.1)                                   |
| Prior other frailty markers                                |                                               |                                            |
| Ambulance / life support                                   | 3,516 (0.6)                                   | 123 (0.4)                                  |
| Non-SNF-related rehabilitation<br>services                 | 22,434 (4.1)                                  | 1,224 (4.1)                                |

Abbreviations: CDHP, consumer directed health plan; EPO, exclusive provider organization; HMO, health maintenance organization; IQR, interquartile range; POS, point of service; PPO, preferred provider organization; SD, standard deviation; SNF, skilled nursing facility.

<sup>a</sup> Demographic characteristics were assessed on the index date. Index characteristics were assessed on the index date. Baseline characteristics prior to index were assessed in the 180-day baseline period before the index date (days -180 to -1) with the exception of Elixhauser comorbidities, durable medical equipment, and other frailty markers, which were assessed through the index date (days -180 to 0).

<sup>b</sup> Results are expressed as N (%) unless otherwise indicated.

° For children diagnosed with asthma/allergy or asthma exacerbation, antibiotic prescriptions were categorized as appropriate (no antibiotic) or inappropriate (antibiotic).

**eTable 18. Distribution of Index Antibiotic Agents Prescribed to Children by Noninfectious Clinical Condition<sup>a</sup>**

| <b>Antibiotic Agent</b> | <b>Asthma/Allergy<br/>n = 507,429 (%)</b> | <b>Asthma Exacerbation<br/>n = 68,922 (%)</b> |
|-------------------------|-------------------------------------------|-----------------------------------------------|
| None                    | 96.7                                      | 81.2                                          |
| Amoxicillin-clavulanate | 0.3                                       | 2.2                                           |
| Amoxicillin             | 1.0                                       | 6.6                                           |
| Azithromycin            | 1.5                                       | 7.2                                           |
| Cefdinir                | 0.3                                       | 2.0                                           |
| Other antibiotic agent  | 0.3                                       | 0.9                                           |

<sup>a</sup> Grey box denotes appropriate treatment per guidelines. Antibiotic agents used by  $\geq 1\%$  of either noninfectious clinical condition cohort are reported individually for both cohorts.



**eTable 19. Number of Exclusions For Adverse Drug Event Outcomes That Occurred Within 30 Days Prior to The Index Date By Noninfectious Clinical Condition**

| Adverse Drug Event Outcome                            | Noninfectious Clinical Condition |                                     |
|-------------------------------------------------------|----------------------------------|-------------------------------------|
|                                                       | Asthma/Allergy<br>N=507,429 (%)  | Asthma Exacerbation<br>N=68,922 (%) |
| Nausea / vomiting / abdominal pain                    | 3,388 (0.7)                      | 1,510 (2.2)                         |
| Non- <i>C. difficile</i> diarrhea                     | 2,800 (0.6)                      | 434 (0.6)                           |
| <i>C. difficile</i> infection                         | 4 (0.0)                          | 2 (0.0)                             |
| Anaphylaxis / angioedema / laryngeal edema            | 180 (0.0)                        | 13 (0.0)                            |
| Skin rash / urticaria                                 | 11,769 (2.3)                     | 613 (0.9)                           |
| Unspecified allergy                                   | 16,828 (3.3)                     | 170 (0.3)                           |
| Tendinopathy                                          | 567 (0.1)                        | 69 (0.1)                            |
| Stevens-Johnson syndrome / toxic epidermal necrolysis | 5 (0.0)                          | 0 (0.0)                             |
| Acute kidney failure                                  | 6 (0.0)                          | 1 (0.0)                             |

**eTable 20. Unadjusted and Propensity Score–Weighted Hazard Ratio Estimates of Adverse Drug Events Following Inappropriate vs Appropriate Antibiotic Prescriptions Among Pediatric Patients by Noninfectious Clinical Condition**

| Index Diagnosis / Adverse Drug Event Outcome          | HR (95% CI) <sup>a</sup> |                           |
|-------------------------------------------------------|--------------------------|---------------------------|
|                                                       | Unadjusted               | IPT-weighted <sup>b</sup> |
| Asthma/Allergy                                        |                          |                           |
| Nausea / vomiting / abdominal pain                    | 1.18 (0.94–1.48)         | 1.09 (0.85-1.41)          |
| Non- <i>C. difficile</i> diarrhea                     | 1.14 (0.86–1.51)         | 1.03 (0.74-1.43)          |
| <i>C. difficile</i> infection                         | NE                       | NE                        |
| Anaphylaxis / angioedema / laryngeal edema            | 0.44 (0.27-0.74)         | 0.92 (0.46-1.83)          |
| Skin rash / urticaria                                 | 1.59 (1.25-2.02)         | 1.96 (1.44-2.66)          |
| Unspecified allergy                                   | 1.96 (1.23-3.11)         | 2.77 (1.50-5.11)          |
| Tendinopathy                                          | 0.57 (0.34-0.95)         | 0.45 (0.26-0.77)          |
| Stevens-Johnson syndrome / toxic epidermal necrolysis | NE                       | NE                        |
| Acute kidney failure                                  | NE                       | NE                        |
| Asthma Exacerbation                                   |                          |                           |
| Nausea / vomiting / abdominal pain                    | 0.93 (0.72-1.22)         | 0.84 (0.72-1.23)          |
| Non- <i>C. difficile</i> diarrhea                     | 0.94 (0.69-1.30)         | 0.96 (0.69-1.34)          |
| <i>C. difficile</i> infection                         | NE                       | NE                        |
| Anaphylaxis / angioedema / laryngeal edema            | NE                       | NE                        |
| Skin rash / urticaria                                 | 1.55 (1.14-2.11)         | 1.55 (1.13-2.14)          |
| Unspecified allergy                                   | 1.01 (0.52-1.97)         | 1.24 (0.57-2.71)          |
| Tendinopathy                                          | 1.23 (0.75-2.05)         | 1.31 (0.76-2.24)          |
| Stevens-Johnson syndrome / toxic epidermal necrolysis | NE                       | NE                        |
| Acute kidney failure                                  | NE                       | NE                        |

Abbreviations: CI, confidence interval; HR, hazard ratio;; IPT, inverse probability of treatment; NE, not estimable.

<sup>a</sup> For hazard ratio estimation, we required ≥ 5 adverse event cases in both the reference category (i.e., appropriate antibiotic prescription) and the comparator group (i.e., inappropriate antibiotic prescription) to ensure stability of the effect estimate.

**eTable 21. Inverse Probability of Treatment–Weighted 30-Day Health Care Utilization and All-Cause and Adverse Drug Event–Related Total Per-Patient and Attributable Expenditure Estimates of Inappropriate Antibiotic Prescriptions Among Children by Noninfectious Clinical Condition<sup>a</sup>**

| <b>Expenditure Category</b>             | <b>Appropriate Health Care Utilization N (%)</b> | <b>Inappropriate Health Care Utilization N (%)</b> | <b>Appropriate Total Per-patient Expenditure Estimates (mean (SD)), \$</b> | <b>Inappropriate Total Per-patient Expenditure Estimates (mean (SD)), \$</b> | <b>Patient-level Attributable Expenditure Estimates (95% CI), \$</b> |
|-----------------------------------------|--------------------------------------------------|----------------------------------------------------|----------------------------------------------------------------------------|------------------------------------------------------------------------------|----------------------------------------------------------------------|
| <b>Asthma/Allergy</b>                   |                                                  |                                                    |                                                                            |                                                                              |                                                                      |
| All-cause total expenditures            | 465,736 (100.0)                                  | 15,834 (100.0)                                     | 727 (2,969)                                                                | 928 (8,675)                                                                  | 246 (147, 327)                                                       |
| Inpatient medical expenditures          | 1,101 (0.2)                                      | 42 (0.3)                                           | 54 (2,354)                                                                 | 164 (8,401)                                                                  | 60 (-23, 122)                                                        |
| Emergency department expenditures       | 23,918 (5.1)                                     | 1,003 (6.3)                                        | 93 (626)                                                                   | 70 (559)                                                                     | 28 (11, 45)                                                          |
| Outpatient medical expenditures         | 457,914 (98.3)                                   | 15,435 (97.5)                                      | 455 (1,410)                                                                | 506 (1,638)                                                                  | 95 (60, 126)                                                         |
| Outpatient pharmacy expenditures        | 250,147 (53.7)                                   | 15,833 (100.0)                                     | 125 (641)                                                                  | 188 (990)                                                                    | 64 (46, 77)                                                          |
| Adverse drug event-related expenditures | 6,143 (1.3)                                      | 266 (1.7)                                          | 17 (1,762)                                                                 | 52 (2,722)                                                                   | 21 (-13, 45)                                                         |
| <b>Asthma Exacerbation</b>              |                                                  |                                                    |                                                                            |                                                                              |                                                                      |
| All-cause total expenditures            | 48,432 (100.0)                                   | 12,363 (100.0)                                     | 947 (4,131)                                                                | 1019 (9,196)                                                                 | 48 (-96, 162)                                                        |
| Inpatient medical expenditures          | 206 (0.4)                                        | 45 (0.4)                                           | 102 (3,622)                                                                | 170 (9,013)                                                                  | 50 (-110, 155)                                                       |
| Emergency department expenditures       | 1,459 (3.0)                                      | 319 (2.6)                                          | 73 (672)                                                                   | 66 (557)                                                                     | -6 (-18, 7)                                                          |
| Outpatient medical expenditures         | 48,410 (100.0)                                   | 12,361 (100.0)                                     | 529 (1,314)                                                                | 512 (1,418)                                                                  | -20 (-48, 5)                                                         |
| Outpatient pharmacy expenditures        | 34,628 (71.5)                                    | 12,359 (100.0)                                     | 243 (1,018)                                                                | 272 (726)                                                                    | 23 (9, 37)                                                           |
| Adverse drug event-related expenditures | 667 (1.4)                                        | 197 (1.6)                                          | 50 (5,275)                                                                 | 30 (722)                                                                     | -26 (-59, 46)                                                        |

Abbreviations: CI, confidence interval; SD, standard deviation.

<sup>a</sup> In the inverse probability of treatment (IPT)-weighted population, all measured baseline characteristics were well-balanced between treatment groups (standardized mean differences [SMD] < 0.10) with the following exceptions: provider specialty for all-cause and ADE-related expenditures for the asthma/allergy cohort (SMD=0.11), and plan type for all-cause and ADE-related expenditures for the asthma/allergy cohort (SMD=0.15).

**eTable 22. Total Attributable Expenditures of Inappropriate Antibiotic Prescriptions Among Children by Noninfectious Clinical Condition**

| Index Diagnoses                                                                           | Attributable Expenditures (2018 USD) |                                |                                  |                                  |                                    |
|-------------------------------------------------------------------------------------------|--------------------------------------|--------------------------------|----------------------------------|----------------------------------|------------------------------------|
|                                                                                           | Inpatient Medical, \$                | Emergency Department, \$       | Outpatient Medical, \$           | Outpatient Pharmacy, \$          | Total, \$                          |
| Noninfectious clinical condition- standardized to the 2017 US employer-insured population |                                      |                                |                                  |                                  |                                    |
| Asthma/Allergy                                                                            | 2,439,085 (-950,915, 4,960,713)      | 1,140,576 (435,878, 1,830,835) | 3,848,991 (2,435,651, 5,136,757) | 2,587,002 (1,876,808, 3,141,250) | 10,013,746 (5,974,159, 13,298,088) |
| Asthma Exacerbation                                                                       | 1,641,822 (-3,589,834, 5,077,715)    | -197,130 (-580,191, 236,145)   | -645,578 (-1,583,992, 154,846)   | 765,364 (299,895, 1,211,160)     | 1,564,286 (-3,159,342, 5,290,930)  |
| Noninfectious clinical condition- in 2017 MarketScan study population                     |                                      |                                |                                  |                                  |                                    |
| Asthma/Allergy                                                                            | 390,877 (-152,389, 794,981)          | 182,784 (69,852, 293,401)      | 616,822 (390,326, 823,193)       | 414,581 (300,769, 503,402)       | 1,604,758 (957,392, 2,131,091)     |
| Asthma Exacerbation                                                                       | 256,737 (-561,353, 794,018)          | -30,826 (-90,726, 36,927)      | -100,951 (-247,694, 24,214)      | 119,682 (46,895, 189,393)        | 244,612 (-494,036, 827,359)        |

Abbreviations: USD, United States dollar..

**eTable 23. Sensitivity Analyses for Inverse Probability of Treatment–Weighted All-Cause Attributable Expenditure Estimates of Inappropriate Antibiotic Prescriptions Among Children by Condition**

| Index Diagnosis                                                                                                                 | Patient-level All-Cause Attributable Expenditure Estimates (95% CI), \$ |
|---------------------------------------------------------------------------------------------------------------------------------|-------------------------------------------------------------------------|
| <b>90-day expenditures</b>                                                                                                      |                                                                         |
| Bacterial infections (primary analysis)                                                                                         |                                                                         |
| Suppurative OM                                                                                                                  | 105 (83, 129)                                                           |
| Pharyngitis                                                                                                                     | 72 (43, 98)                                                             |
| Sinusitis                                                                                                                       | 14 (-33, 57)                                                            |
| Viral infections (secondary analysis)                                                                                           |                                                                         |
| Influenza                                                                                                                       | 521 (-302, 979)                                                         |
| Viral URI                                                                                                                       | 157 (106, 202)                                                          |
| Bronchiolitis                                                                                                                   | 107 (-150, 324)                                                         |
| Bronchitis                                                                                                                      | -7 (-78, 74)                                                            |
| Non-suppurative OM                                                                                                              | -114 (-171, -61)                                                        |
| <b>30-day expenditures, excluding HMO and POS with capitation plans</b>                                                         |                                                                         |
| Bacterial infections (primary analysis)                                                                                         |                                                                         |
| Suppurative OM                                                                                                                  | 52 (41, 66)                                                             |
| Pharyngitis                                                                                                                     | 41 (30, 51)                                                             |
| Sinusitis                                                                                                                       | 24 (4, 43)                                                              |
| Viral infections (secondary analysis)                                                                                           |                                                                         |
| Influenza                                                                                                                       | 82 (24, 321)                                                            |
| Viral URI                                                                                                                       | 79 (47, 103)                                                            |
| Bronchiolitis                                                                                                                   | 16 (-91, 100)                                                           |
| Bronchitis                                                                                                                      | -20 (-56, 17)                                                           |
| Non-suppurative OM                                                                                                              | -104 (-127, -79)                                                        |
| <b>30-day expenditures, inappropriate antibiotic definition expanded to include inappropriate agent or duration<sup>a</sup></b> |                                                                         |
| Bacterial infections (primary analysis)                                                                                         |                                                                         |
| Suppurative OM                                                                                                                  | 44 (12, 74)                                                             |
| Pharyngitis                                                                                                                     | 39 (25, 51)                                                             |
| Sinusitis                                                                                                                       | 18 (3, 36)                                                              |

Abbreviations: CI, confidence interval; OM, otitis media; URI, upper respiratory infection.

<sup>a</sup> Inappropriate duration was only relevant for bacterial infections; any antibiotic was considered inappropriate for viral infections.

**eFigure 1. Derivation of Pediatric Infection Cohort in MarketScan Commercial Database (Index Events April 1, 2016, to September 30, 2018)**

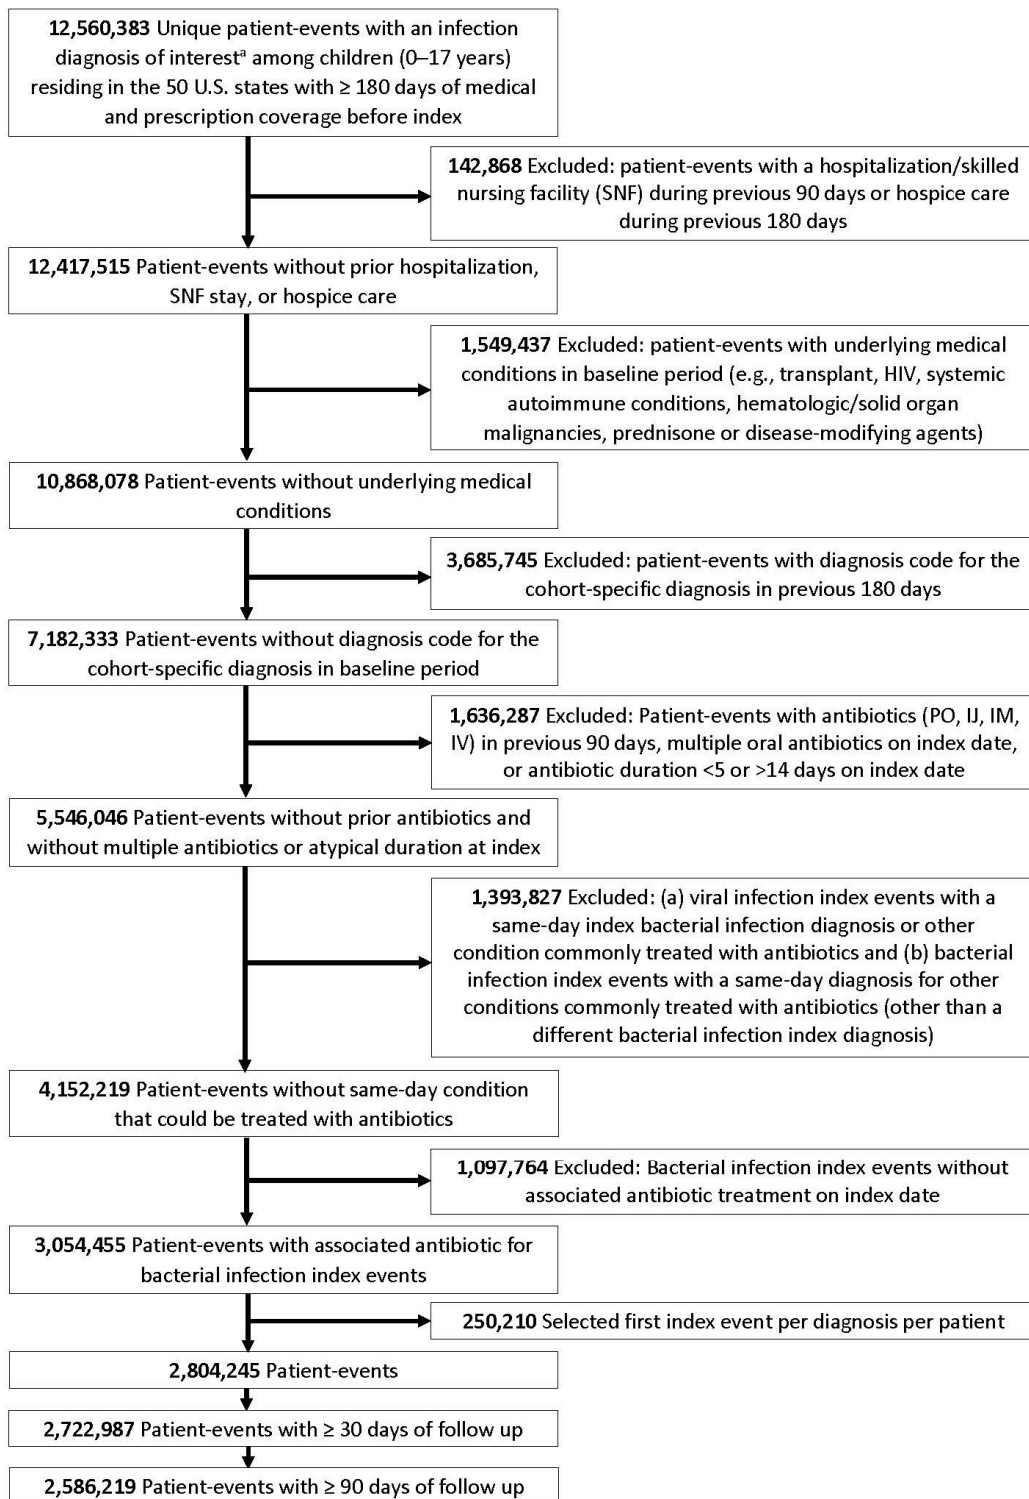

<sup>s</sup> Infections of interest include three bacterial infections (suppurative OM, pharyngitis, and sinusitis) and five viral infections (influenza, viral URI, bronchiolitis, bronchitis, and non-suppurative OM) which were identified on outpatient claims with a claimline payment of > \$0.

**eFigure 2. Standardized Mean Differences of Patient- and Provider-Level Characteristics Between Treatment Groups, in the Unweighted and Weighted Pediatric Populations, for Acute Kidney Failure Outcome Cohort<sup>a,b,c,d,e</sup>**

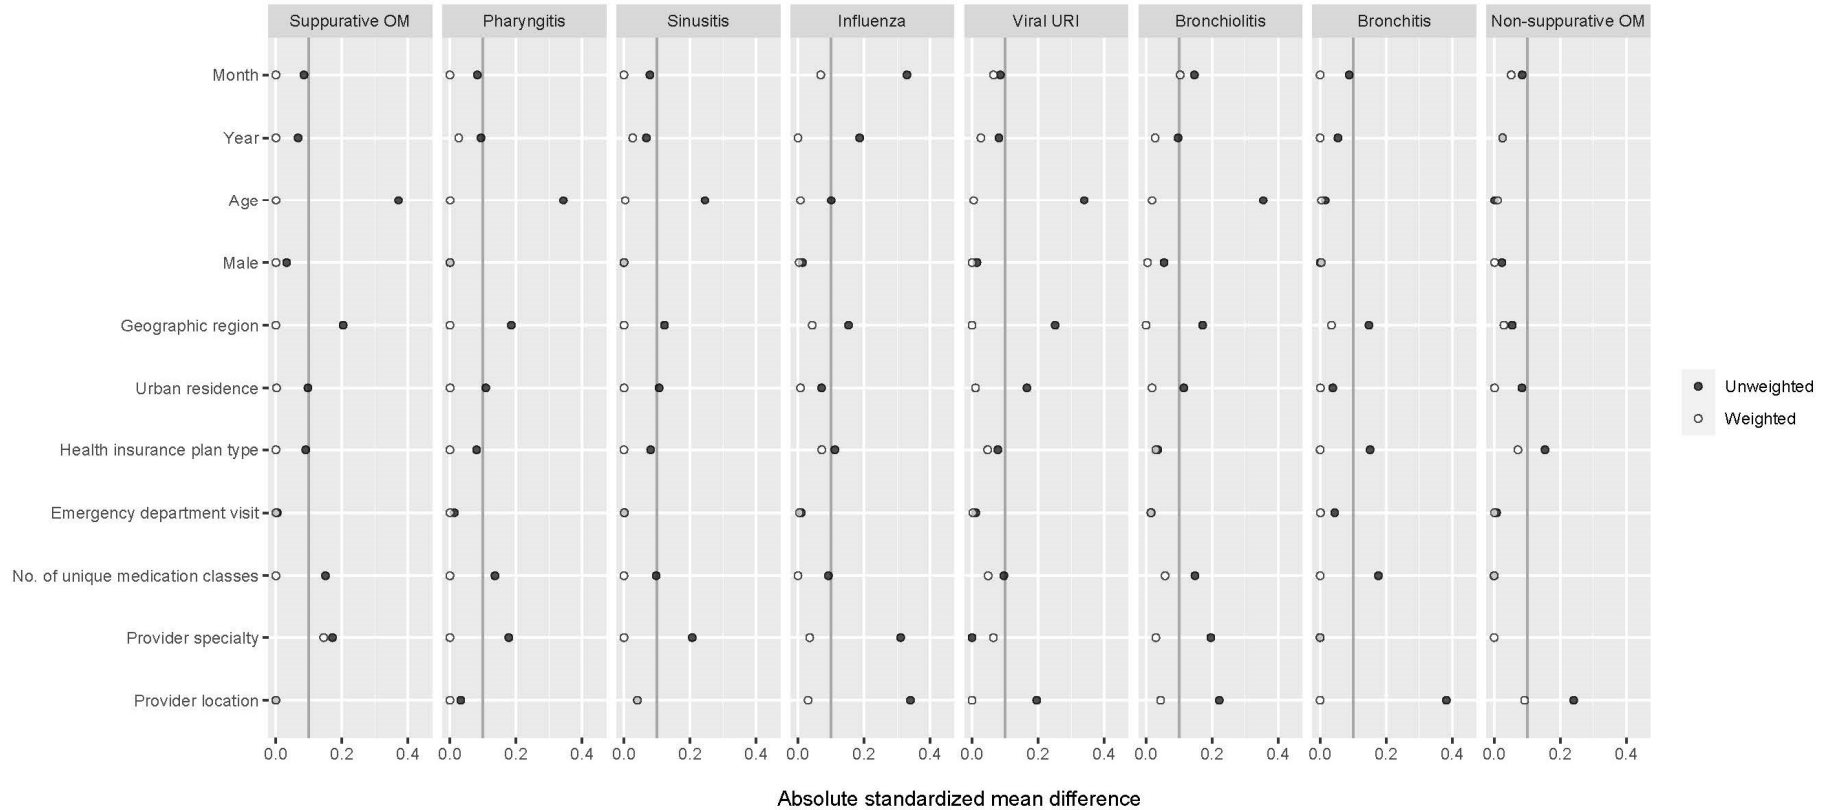

Abbreviations: OM, otitis media; URI, upper respiratory infection.

<sup>a</sup> Standardized mean difference (SMD) calculated as the difference in means or proportions of a variable divided by the pooled standard deviation of the variable. All standardized mean difference estimates compare children who received an appropriate antibiotic (reference) versus an inappropriate antibiotic within each infection cohort, after cohort-specific trimming. Standardized mean differences <0.1 indicate no substantial difference in means or proportions between groups. In the inverse probability of treatment (IPT)-weighted population, all measured baseline characteristics were well-balanced between treatment groups (standardized mean differences < 0.10) with the following exceptions: provider specialty for suppurative otitis media for the analysis of nausea/vomiting/abdominal pain, non-*C. difficile* diarrhea, *C. difficile* infection, anaphylaxis/angioedema/laryngeal edema, skin rash/urticaria, unspecified allergy, and tendinopathy (all SMDs=0.15); month of index for bronchiolitis for the analysis of nausea/vomiting/abdominal pain, non-*C. difficile* diarrhea, *C. difficile* infection, anaphylaxis/angioedema/laryngeal edema, unspecified allergy, and tendinopathy (all SMDs=0.10); month of index for viral URI for the analysis of nausea/vomiting/abdominal pain (SMD=0.11).



<sup>b</sup> Each outcome was evaluated in a separate cohort with a separate propensity score model and weights. The acute kidney failure cohort is presented here as a representative example because it had few cases of acute kidney failure in the 30 days prior to the index date (i.e., 15 cases across all viral and bacterial infection cohorts) and thus made few exclusions based on previous ascertainment of the outcome.

<sup>c</sup> Demographics were identified in the month of index. Emergency department visits and unique medication classes were identified in the baseline period before index. Provider specialty and provider location refer to the index diagnosis.

<sup>d</sup> Grey shaded circles reflect overlap of unweighted and weighted SMDs.

<sup>e</sup> The unweighted SMD for provider specialty for the non-suppurative OM cohort is not presented as the SMD was  $>0.6$ .

### eFigure 3. Propensity Score–Weighted Hazard Ratio Estimates of Additional Adverse Drug Events Following Inappropriate vs Appropriate Antibiotic Prescriptions Among Pediatric Patients<sup>a, b</sup>

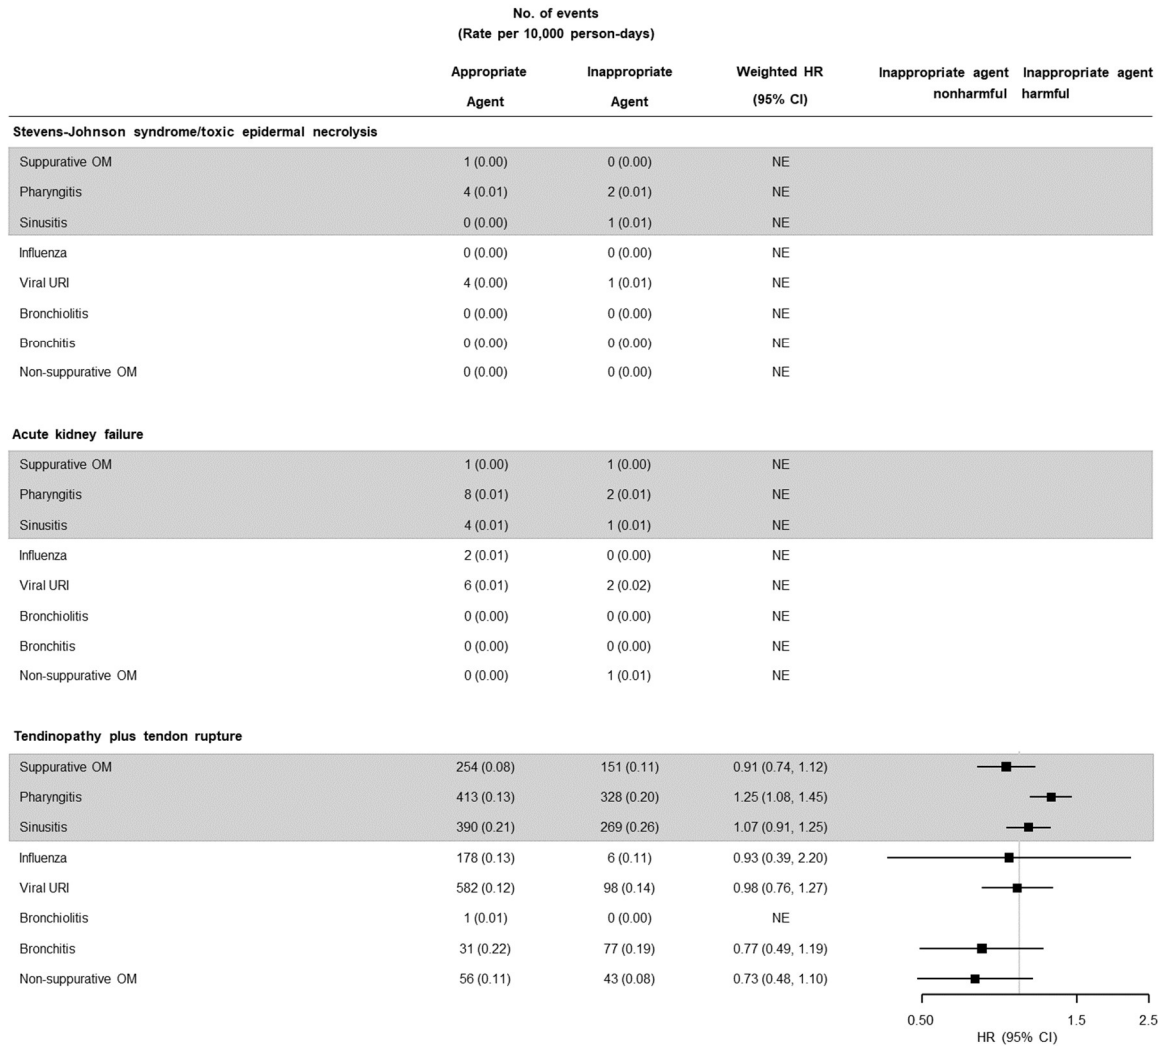

Abbreviations: CI, confidence interval; HR, hazard ratio; NE, not estimable; OM, otitis media; URI, upper respiratory infection.

<sup>a</sup> Results for other adverse drug events are presented in Figure 1 (main manuscript).

<sup>b</sup> Shaded infections are bacterial infections, others are viral infections.

**eFigure 4. Standardized Mean Differences of Patient- and Provider-Level Characteristics Between Treatment Groups, in the Unweighted and Weighted Populations of Children with Asthma and Allergy or Asthma Exacerbation, for Acute Kidney Failure Safety Outcome Cohort<sup>a,b,c,d</sup>**

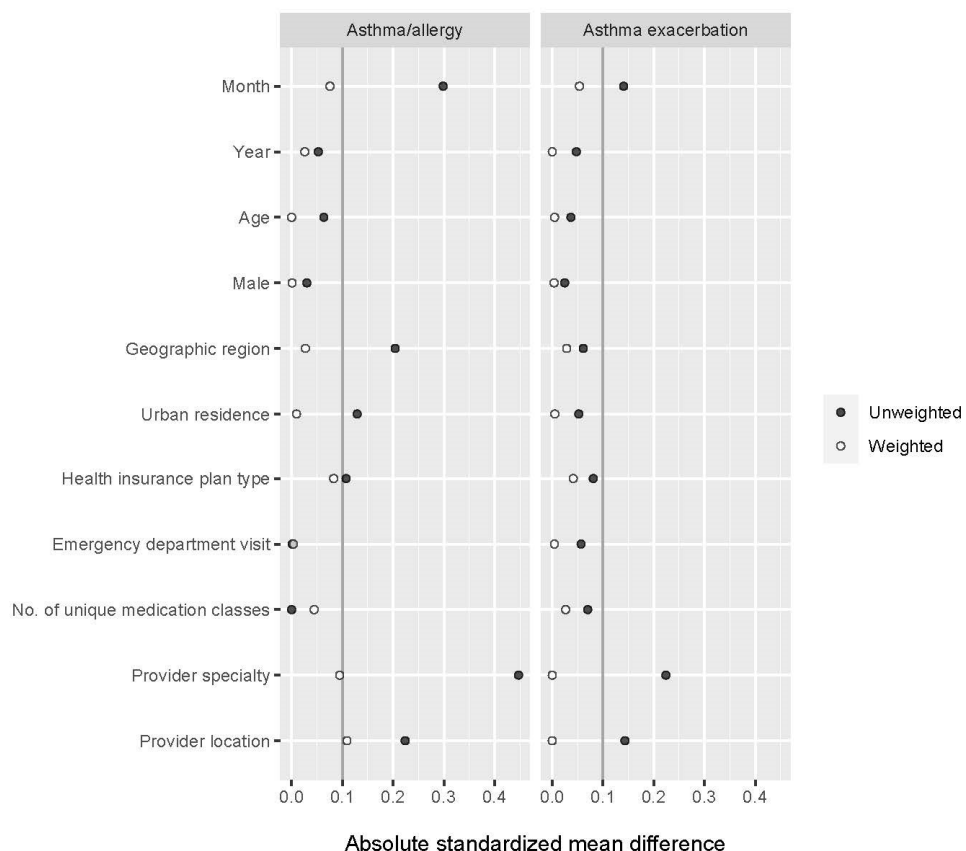

<sup>a</sup> Standardized mean difference (SMD) calculated as the difference in means or proportions of a variable divided by the pooled standard deviation of the variable. All standardized mean difference estimates compare children who received an appropriate antibiotic (reference) versus an inappropriate antibiotic within each infection cohort, after cohort-specific trimming. Standardized mean differences <0.1 indicate no substantial difference in means or proportions between groups. In the inverse probability of treatment (IPT)-weighted population, all measured baseline characteristics were well-balanced between treatment groups (standardized mean differences < 0.10) with the following exceptions: provider location for asthma/allergy for the outcomes of nausea/vomiting/abdominal pain, non-*C. difficile* diarrhea, *C. difficile* infection, anaphylaxis/angioedema/laryngeal edema, skin rash/urticaria, unspecified allergy, and tendinopathy (SMDs 0.11–0.18).

<sup>b</sup> Each outcome was evaluated in a separate cohort with a separate propensity score model and weights. The acute kidney failure cohort is presented here as a representative example because it had few cases of acute kidney failure in the 30 days prior to the index date (i.e., 7 cases in the asthma/allergy cohort) and thus made few exclusions based on previous ascertainment of the outcome.

<sup>c</sup> Demographics were identified in the month of index. Emergency department visits and unique medication classes were identified in the baseline period before index. Provider specialty and provider location refer to the index diagnosis.

<sup>d</sup> Grey shaded circles reflect overlap of unweighted and weighted SMDs.

**eFigure 5. Propensity Score–Weighted Hazard Ratio Estimates of Adverse Drug Events Following Inappropriate vs Appropriate Antibiotic Prescriptions Among Asthma or Allergy and Asthma Exacerbation Pediatric Cohorts**

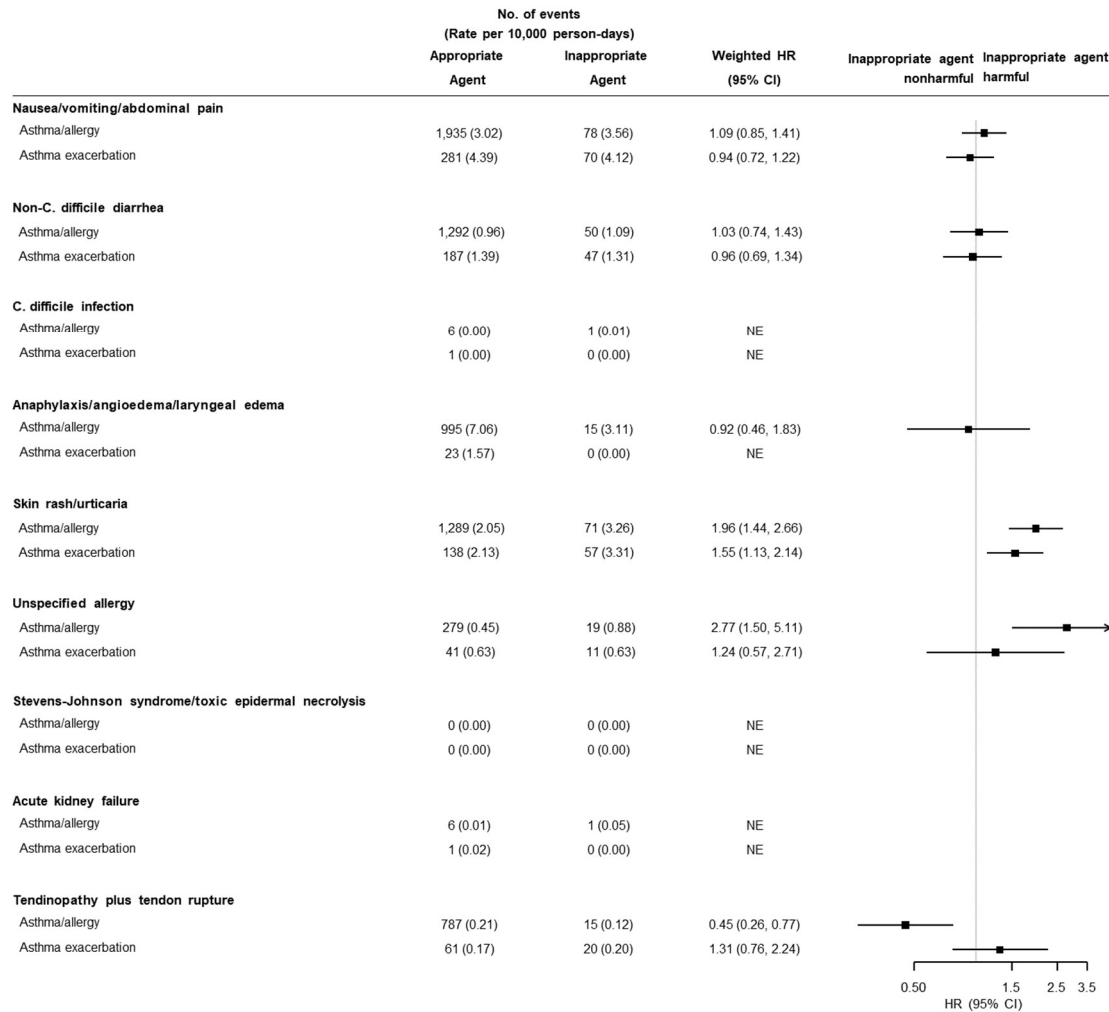

Abbreviations: CI, confidence interval; HR, hazard ratio; NE, not estimable.

**eFigure 6. Weighted 30-Day Attributable Expenditures of Inappropriate Antibiotic Prescriptions for Asthma or Allergy and Asthma Exacerbation Pediatric Cohorts**

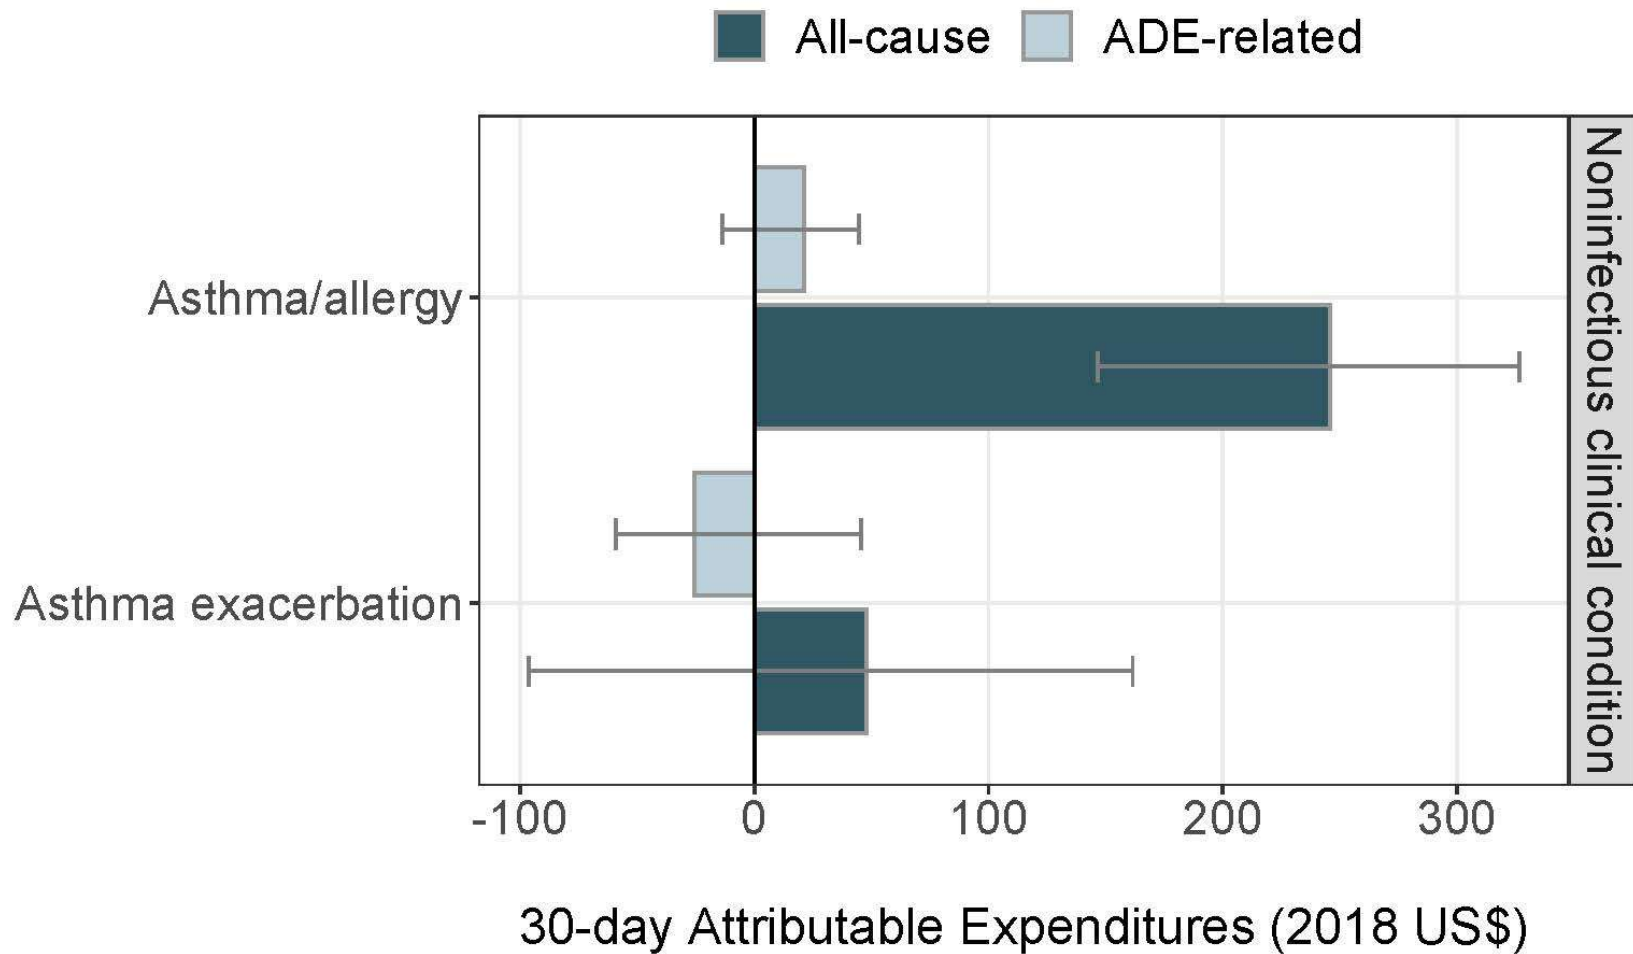

Abbreviations: ADE, adverse drug event.

Grey bars denote 95% confidence interval estimates.

## eReferences.

1. Lieberthal AS, Carroll AE, Chonmaitree T, et al. The diagnosis and management of acute otitis media. *Pediatrics*. Mar 2013;131(3):e964-99. doi:10.1542/peds.2012-3488
2. Shulman ST, Bisno AL, Clegg HW, et al. Clinical practice guideline for the diagnosis and management of group A streptococcal pharyngitis: 2012 update by the Infectious Diseases Society of America. *Clinical infectious diseases : an official publication of the Infectious Diseases Society of America*. Nov 15 2012;55(10):1279-82. doi:10.1093/cid/cis847
3. Chow AW, Benninger MS, Brook I, et al. IDSA clinical practice guideline for acute bacterial rhinosinusitis in children and adults. *Clinical infectious diseases : an official publication of the Infectious Diseases Society of America*. Apr 2012;54(8):e72-e112. doi:10.1093/cid/cir1043
4. Sturmer T, Rothman KJ, Avorn J, Glynn RJ. Treatment effects in the presence of unmeasured confounding: dealing with observations in the tails of the propensity score distribution--a simulation study. *American journal of epidemiology*. Oct 1 2010;172(7):843-54. doi:10.1093/aje/kwq198
5. Stürmer T, Webster-Clark M, Lund JL, et al. Propensity Score Weighting and Trimming Strategies for Reducing Variance and Bias of Treatment Effect Estimates: A Simulation Study. *American journal of epidemiology*. Aug 1 2021;190(8):1659-1670. doi:10.1093/aje/kwab041
6. Austin PC. Balance diagnostics for comparing the distribution of baseline covariates between treatment groups in propensity-score matched samples. *Statistics in medicine*. Nov 10 2009;28(25):3083-107. doi:10.1002/sim.3697
